# Supplementary material for: Patritumab deruxtecan (HER3-DXd), a novel HER3 directed antibody drug conjugate, exhibits in vitro activity against breast cancer cells expressing HER3 mutations with and without HER2 overexpression
Source: PubMed Central journal article supplement (PMC9064083; doi:10.1371/journal.pone.0267027), 2022-05-03
Supplement: pone.0267027.s006.pdf [file pone.0267027.s006.pdf]

A) HER2 overexpression (-)

| HER3  | Cell surface MFI in HER3 positive cells |                    |                  |                   |                    | Corrected cell surface MFI in HER3 positive cells |                    |                  |                   |                    |
|-------|-----------------------------------------|--------------------|------------------|-------------------|--------------------|---------------------------------------------------|--------------------|------------------|-------------------|--------------------|
|       | Unstained                               | 0.1 nM<br>HER3-DXd | 1 nM<br>HER3-DXd | 10 nM<br>HER3-DXd | 100 nM<br>HER3-DXd | Unstained                                         | 0.1 nM<br>HER3-DXd | 1 nM<br>HER3-DXd | 10 nM<br>HER3-DXd | 100 nM<br>HER3-DXd |
| EV    | 70.3                                    | 130                | 127              | 188               | 231                | 0                                                 | 59.7               | 56.7             | 117.7             | 160.7              |
| WT    | 66.6                                    | 256                | 1145             | 2027              | 2290               | 0                                                 | 189.4              | 1078.4           | 1960.4            | 2223.4             |
| V104L | 67.3                                    | 252                | 1043             | 2130              | 2418               | 0                                                 | 184.7              | 975.7            | 2062.7            | 2350.7             |
| V104M | 66.7                                    | 294                | 1283             | 2209              | 2472               | 0                                                 | 227.3              | 1216.3           | 2142.3            | 2405.3             |
| A232V | 66.6                                    | 267                | 1115             | 2165              | 2439               | 0                                                 | 200.4              | 1048.4           | 2098.4            | 2372.4             |
| P262H | 66.6                                    | 301                | 1284             | 2251              | 2494               | 0                                                 | 234.4              | 1217.4           | 2184.4            | 2427.4             |
| G284R | 67.1                                    | 242                | 1055             | 2123              | 2399               | 0                                                 | 174.9              | 987.9            | 2055.9            | 2331.9             |
| D297Y | 66.7                                    | 249                | 1109             | 2092              | 2289               | 0                                                 | 182.3              | 1042.3           | 2025.3            | 2222.3             |
| G325R | 66.7                                    | 246                | 1131             | 2111              | 2356               | 0                                                 | 179.3              | 1064.3           | 2044.3            | 2289.3             |
| T355I | 66.5                                    | 253                | 1140             | 2301              | 2580               | 0                                                 | 186.5              | 1073.5           | 2234.5            | 2513.5             |
| S846I | 69.9                                    | 249                | 1021             | 2124              | 2371               | 0                                                 | 179.1              | 951.1            | 2054.1            | 2301.1             |
| E928G | 66.5                                    | 232                | 1098             | 2109              | 2357               | 0                                                 | 165.5              | 1031.5           | 2042.5            | 2290.5             |

Corrected cell surface MFI was subtracted by unstained value.

B) HER2 overexpression (+)

| HER3       | Cell surface MFI in HER3 positive cells |                    |                  |                   |                    | Corrected cell surface MFI in HER3 positive cells |                    |                  |                   |                    |
|------------|-----------------------------------------|--------------------|------------------|-------------------|--------------------|---------------------------------------------------|--------------------|------------------|-------------------|--------------------|
|            | Unstained                               | 0.1 nM<br>HER3-DXd | 1 nM<br>HER3-DXd | 10 nM<br>HER3-DXd | 100 nM<br>HER3-DXd | Unstained                                         | 0.1 nM<br>HER3-DXd | 1 nM<br>HER3-DXd | 10 nM<br>HER3-DXd | 100 nM<br>HER3-DXd |
| EV         | 68.6                                    | 118                | 139              | 176               | 194                | 0                                                 | 49.4               | 70.4             | 107.4             | 125.4              |
| WT         | 67.9                                    | 314                | 1514             | 2597              | 2864               | 0                                                 | 246.1              | 1446.1           | 2529.1            | 2796.1             |
| V104L      | 69.3                                    | 288                | 1451             | 2936              | 3263               | 0                                                 | 218.7              | 1381.7           | 2866.7            | 3193.7             |
| V104M      | 69.8                                    | 330                | 1522             | 2431              | 2691               | 0                                                 | 260.2              | 1452.2           | 2361.2            | 2621.2             |
| A232V      | 69.4                                    | 361                | 1683             | 2674              | 2979               | 0                                                 | 291.6              | 1613.6           | 2604.6            | 2909.6             |
| P262H      | 69.3                                    | 412                | 2032             | 3033              | 3276               | 0                                                 | 342.7              | 1962.7           | 2963.7            | 3206.7             |
| G284R      | 69                                      | 259                | 1313             | 2554              | 2840               | 0                                                 | 190.0              | 1244.0           | 2485.0            | 2771.0             |
| D297Y      | 69.1                                    | 298                | 1476             | 2770              | 3048               | 0                                                 | 228.9              | 1406.9           | 2700.9            | 2978.9             |
| G325R      | 68.9                                    | 310                | 1526             | 2857              | 3110               | 0                                                 | 241.1              | 1457.1           | 2788.1            | 3041.1             |
| T355I      | 69.2                                    | 302                | 1689             | 3083              | 3363               | 0                                                 | 232.8              | 1619.8           | 3013.8            | 3293.8             |
| S846I      | 69.3                                    | 293                | 1524             | 2758              | 3057               | 0                                                 | 223.7              | 1454.7           | 2688.7            | 2987.7             |
| E928G      | 69.6                                    | 331                | 1556             | 2803              | 3048               | 0                                                 | 261.4              | 1486.4           | 2733.4            | 2978.4             |
| EV (HER2-) | 70.5                                    | 97.8               | 130              | 143               | 214                | 0                                                 | 27.3               | 59.5             | 72.5              | 143.5              |
| WT (HER2-) | 68.2                                    | 291                | 1344             | 2341              | 2560               | 0                                                 | 222.8              | 1275.8           | 2272.8            | 2491.8             |

Corrected cell surface MFI was subtracted by unstained value.

C) HER2 overexpression (+), Q809R

| HER3       | Cell surface MFI in HER3 positive cells |                    |                  |                   |                    | Corrected cell surface MFI in HER3 positive cells |                    |                  |                   |                    |
|------------|-----------------------------------------|--------------------|------------------|-------------------|--------------------|---------------------------------------------------|--------------------|------------------|-------------------|--------------------|
|            | Unstained                               | 0.1 nM<br>HER3-DXd | 1 nM<br>HER3-DXd | 10 nM<br>HER3-DXd | 100 nM<br>HER3-DXd | Unstained                                         | 0.1 nM<br>HER3-DXd | 1 nM<br>HER3-DXd | 10 nM<br>HER3-DXd | 100 nM<br>HER3-DXd |
| EV         | 64.3                                    | 96                 | 115              | 141               | 162                | 0                                                 | 31.7               | 50.7             | 76.7              | 97.7               |
| WT         | 63.3                                    | 263                | 1107             | 2427              | 2631               | 0                                                 | 199.7              | 1043.7           | 2363.7            | 2567.7             |
| Q809R      | 63.5                                    | 261                | 1185             | 2523              | 2716               | 0                                                 | 197.5              | 1121.5           | 2459.5            | 2652.5             |
| EV (HER2-) | 65.1                                    | 143                | 108              | 137               | 161                | 0                                                 | 77.9               | 42.9             | 71.9              | 95.9               |
| WT (HER2-) | 62.4                                    | 241                | 1057             | 2298              | 2428               | 0                                                 | 178.6              | 994.6            | 2235.6            | 2365.6             |

Corrected cell surface MFI was subtracted by unstained value.
