# Supplementary material for: Patritumab deruxtecan (HER3-DXd), a novel HER3 directed antibody drug conjugate, exhibits in vitro activity against breast cancer cells expressing HER3 mutations with and without HER2 overexpression
Source: PubMed Central journal article supplement (PMC9064083; doi:10.1371/journal.pone.0267027), 2022-05-03
Supplement: pone.0267027.s007.pdf [file pone.0267027.s007.pdf]

A) HER2 overexpression (-)

| Time (h) | EV    |        |       |       | WT    |        |        |        | V104L |        |        |        | V104M |        |        |        |
|----------|-------|--------|-------|-------|-------|--------|--------|--------|-------|--------|--------|--------|-------|--------|--------|--------|
|          | BG    | 0.1 nM | 1 nM  | 10 nM | BG    | 0.1 nM | 1 nM   | 10 nM  | BG    | 0.1 nM | 1 nM   | 10 nM  | BG    | 0.1 nM | 1 nM   | 10 nM  |
| 0        | 0.963 | 0.821  | 0.774 | 0.962 | 1.383 | 1.706  | 2.072  | 5.270  | 0.958 | 0.904  | 1.086  | 2.908  | 1.252 | 1.078  | 1.908  | 4.905  |
| 0.5      | 1.351 | 1.373  | 1.490 | 1.425 | 2.166 | 3.221  | 5.537  | 7.705  | 1.342 | 1.491  | 4.242  | 6.745  | 1.857 | 1.842  | 4.828  | 7.034  |
| 1        | 1.789 | 2.527  | 1.893 | 2.564 | 3.511 | 5.606  | 8.103  | 10.256 | 1.729 | 2.589  | 6.740  | 8.816  | 3.064 | 3.574  | 6.559  | 8.829  |
| 1.5      | 2.763 | 2.992  | 3.216 | 3.553 | 4.993 | 7.352  | 10.198 | 11.799 | 2.912 | 3.812  | 8.005  | 9.422  | 3.912 | 5.111  | 8.121  | 11.066 |
| 2        | 3.108 | 3.394  | 3.171 | 3.807 | 5.788 | 8.002  | 10.403 | 13.029 | 3.457 | 4.850  | 9.185  | 10.221 | 4.502 | 6.567  | 9.704  | 11.289 |
| 2.5      | 2.890 | 3.848  | 3.695 | 4.591 | 7.148 | 8.603  | 9.885  | 11.452 | 3.720 | 5.543  | 9.283  | 10.510 | 5.200 | 6.296  | 8.487  | 11.821 |
| 3        | 3.950 | 4.093  | 3.513 | 4.271 | 6.652 | 9.976  | 10.306 | 13.780 | 4.148 | 6.086  | 9.851  | 10.308 | 5.543 | 6.782  | 9.067  | 12.830 |
| 3.5      | 4.154 | 4.024  | 3.993 | 5.022 | 7.199 | 10.533 | 12.427 | 13.059 | 4.062 | 6.561  | 10.202 | 10.850 | 6.308 | 8.103  | 11.909 | 13.716 |
| 4        | 4.387 | 4.364  | 3.699 | 4.858 | 7.324 | 10.070 | 11.855 | 13.965 | 4.843 | 6.978  | 9.630  | 11.009 | 5.218 | 8.101  | 10.522 | 12.697 |
| 4.5      | 3.891 | 4.560  | 4.105 | 4.828 | 7.380 | 10.432 | 11.168 | 13.401 | 4.675 | 6.396  | 10.319 | 11.277 | 6.172 | 7.560  | 10.866 | 12.810 |
| 5        | 3.598 | 4.287  | 4.413 | 5.347 | 7.603 | 10.682 | 12.505 | 14.686 | 4.763 | 6.924  | 10.889 | 11.370 | 6.805 | 9.269  | 11.272 | 13.799 |
| 5.5      | 4.059 | 3.960  | 3.873 | 4.815 | 7.744 | 10.336 | 13.233 | 14.337 | 4.708 | 7.252  | 11.680 | 11.104 | 6.617 | 8.611  | 11.150 | 12.477 |
| 6        | 3.927 | 4.785  | 4.204 | 5.025 | 7.521 | 10.279 | 12.454 | 15.002 | 4.356 | 6.978  | 12.222 | 10.914 | 6.410 | 8.820  | 11.823 | 13.315 |
| 6.5      | 3.978 | 4.194  | 3.887 | 4.969 | 7.426 | 11.519 | 11.753 | 14.055 | 4.773 | 7.209  | 11.113 | 12.669 | 6.536 | 9.146  | 11.979 | 14.093 |
| 7        | 3.195 | 4.447  | 4.382 | 4.940 | 7.338 | 10.794 | 12.891 | 14.684 | 4.364 | 7.270  | 11.716 | 13.171 | 5.628 | 8.208  | 12.072 | 14.819 |
| 7.5      | 3.140 | 3.966  | 3.997 | 5.362 | 7.914 | 10.392 | 13.068 | 14.440 | 4.109 | 7.164  | 12.041 | 13.245 | 6.055 | 8.499  | 11.304 | 13.805 |
| 8        | 4.103 | 3.679  | 3.943 | 4.906 | 6.786 | 10.482 | 12.729 | 14.922 | 4.157 | 7.086  | 11.628 | 13.094 | 6.114 | 8.099  | 10.429 | 12.749 |

|      |       |       |       |       |       |        |        |        |       |       |        |        |       |       |        |        |
|------|-------|-------|-------|-------|-------|--------|--------|--------|-------|-------|--------|--------|-------|-------|--------|--------|
| 8.5  | 3.440 | 3.877 | 4.014 | 4.262 | 6.229 | 11.039 | 10.817 | 13.808 | 4.889 | 7.150 | 9.949  | 11.403 | 6.057 | 8.867 | 11.672 | 13.370 |
| 9    | 3.636 | 3.806 | 3.436 | 4.798 | 6.449 | 10.196 | 12.085 | 13.003 | 4.804 | 6.509 | 10.876 | 11.401 | 5.859 | 7.857 | 10.365 | 13.434 |
| 9.5  | 3.744 | 3.996 | 3.646 | 4.349 | 6.670 | 10.048 | 11.145 | 14.313 | 4.697 | 6.793 | 12.413 | 11.746 | 5.639 | 7.785 | 11.704 | 13.261 |
| 10   | 2.868 | 3.688 | 3.685 | 4.595 | 5.681 | 9.061  | 12.926 | 13.451 | 4.535 | 6.875 | 11.510 | 10.009 | 5.850 | 7.146 | 9.076  | 13.212 |
| 10.5 | 2.727 | 3.151 | 3.375 | 4.704 | 5.468 | 8.816  | 13.049 | 14.428 | 3.884 | 6.444 | 10.555 | 12.286 | 6.046 | 7.712 | 11.442 | 14.079 |
| 11   | 2.772 | 3.139 | 3.493 | 4.026 | 6.192 | 9.642  | 13.067 | 13.287 | 4.193 | 6.647 | 10.742 | 11.919 | 5.535 | 7.210 | 11.057 | 11.411 |
| 11.5 | 3.061 | 2.892 | 3.630 | 3.545 | 5.368 | 8.863  | 11.365 | 13.876 | 3.621 | 7.390 | 11.196 | 11.842 | 4.688 | 7.074 | 10.364 | 12.706 |
| 12   | 2.485 | 3.312 | 3.481 | 4.246 | 5.592 | 9.318  | 13.345 | 14.952 | 3.929 | 6.897 | 12.193 | 12.798 | 5.650 | 7.427 | 11.221 | 13.989 |

| Time (h) | A232V |        |        |        | P262H |        |        |        | G284R |        |        |        | D297Y |        |        |        |
|----------|-------|--------|--------|--------|-------|--------|--------|--------|-------|--------|--------|--------|-------|--------|--------|--------|
|          | BG    | 0.1 nM | 1 nM   | 10 nM  | BG    | 0.1 nM | 1 nM   | 10 nM  | BG    | 0.1 nM | 1 nM   | 10 nM  | BG    | 0.1 nM | 1 nM   | 10 nM  |
| 0        | 1.265 | 1.063  | 1.341  | 2.881  | 0.957 | 1.232  | 2.073  | 4.933  | 0.973 | 1.099  | 1.226  | 2.799  | 1.148 | 1.388  | 2.600  | 5.670  |
| 0.5      | 1.797 | 1.652  | 4.921  | 6.349  | 1.606 | 1.948  | 5.421  | 7.192  | 1.567 | 1.292  | 4.531  | 5.578  | 1.678 | 2.348  | 5.813  | 7.049  |
| 1        | 2.959 | 2.916  | 7.293  | 7.370  | 2.779 | 3.591  | 7.162  | 8.481  | 2.410 | 2.115  | 7.295  | 6.473  | 3.096 | 3.811  | 6.877  | 8.962  |
| 1.5      | 3.510 | 4.544  | 8.582  | 9.254  | 3.213 | 5.195  | 9.349  | 9.625  | 2.515 | 3.824  | 8.047  | 8.693  | 3.618 | 5.392  | 8.585  | 10.057 |
| 2        | 4.288 | 5.364  | 10.456 | 9.931  | 3.851 | 6.015  | 9.806  | 10.429 | 3.843 | 4.361  | 8.470  | 8.543  | 3.894 | 5.421  | 9.116  | 10.609 |
| 2.5      | 3.901 | 6.037  | 8.802  | 9.064  | 4.536 | 6.041  | 9.610  | 12.013 | 3.723 | 5.093  | 9.484  | 9.389  | 4.761 | 6.601  | 9.279  | 9.836  |
| 3        | 4.525 | 6.401  | 9.072  | 10.465 | 4.540 | 6.618  | 10.671 | 12.644 | 3.858 | 5.656  | 9.486  | 9.171  | 4.582 | 7.125  | 10.029 | 11.341 |
| 3.5      | 4.549 | 6.038  | 9.085  | 10.585 | 5.008 | 6.627  | 10.050 | 12.351 | 4.514 | 6.405  | 9.010  | 9.414  | 5.381 | 7.441  | 10.476 | 11.412 |
| 4        | 5.852 | 6.569  | 9.819  | 10.526 | 5.067 | 6.739  | 10.854 | 13.937 | 4.200 | 6.453  | 10.126 | 10.041 | 5.532 | 7.266  | 9.969  | 11.446 |
| 4.5      | 5.147 | 6.796  | 9.604  | 10.499 | 4.623 | 7.353  | 9.824  | 13.933 | 4.062 | 6.115  | 9.668  | 9.861  | 5.301 | 7.963  | 9.934  | 11.280 |
| 5        | 5.350 | 6.996  | 10.987 | 11.092 | 4.365 | 8.495  | 10.379 | 14.058 | 5.105 | 5.767  | 10.315 | 10.512 | 5.584 | 8.340  | 10.627 | 11.972 |

|      |       |       |        |        |       |       |        |        |       |       |        |        |       |       |        |        |
|------|-------|-------|--------|--------|-------|-------|--------|--------|-------|-------|--------|--------|-------|-------|--------|--------|
| 5.5  | 4.815 | 7.127 | 11.253 | 10.454 | 4.230 | 7.804 | 11.240 | 14.225 | 4.671 | 6.324 | 10.698 | 9.975  | 5.421 | 7.720 | 10.373 | 12.110 |
| 6    | 5.523 | 5.772 | 10.476 | 11.006 | 5.015 | 8.289 | 10.001 | 13.945 | 4.291 | 6.446 | 10.284 | 10.908 | 5.056 | 7.505 | 10.131 | 12.283 |
| 6.5  | 4.840 | 7.030 | 9.890  | 10.237 | 5.427 | 8.745 | 11.324 | 13.876 | 4.921 | 6.621 | 10.464 | 12.069 | 5.534 | 9.256 | 11.842 | 12.473 |
| 7    | 5.750 | 7.272 | 10.142 | 11.742 | 4.270 | 8.187 | 12.552 | 14.565 | 4.425 | 6.502 | 9.986  | 11.386 | 5.336 | 7.685 | 10.777 | 13.360 |
| 7.5  | 5.317 | 7.337 | 10.710 | 10.958 | 5.035 | 7.852 | 11.272 | 14.940 | 4.722 | 6.834 | 11.254 | 9.863  | 5.025 | 6.992 | 10.715 | 12.972 |
| 8    | 4.828 | 7.139 | 10.939 | 11.025 | 4.810 | 8.250 | 10.990 | 13.222 | 3.717 | 5.830 | 9.412  | 11.530 | 4.862 | 8.267 | 11.421 | 12.243 |
| 8.5  | 4.460 | 6.007 | 10.419 | 10.673 | 5.046 | 8.143 | 10.179 | 13.160 | 4.094 | 5.874 | 10.465 | 9.346  | 4.258 | 7.322 | 11.779 | 12.011 |
| 9    | 4.783 | 5.545 | 10.486 | 10.529 | 5.143 | 7.443 | 10.503 | 13.330 | 3.980 | 5.594 | 11.179 | 10.620 | 4.461 | 7.776 | 11.392 | 12.681 |
| 9.5  | 4.445 | 6.441 | 9.429  | 12.488 | 4.869 | 8.239 | 11.599 | 12.017 | 4.242 | 6.442 | 11.484 | 10.688 | 4.841 | 7.419 | 10.997 | 11.768 |
| 10   | 4.124 | 6.362 | 9.243  | 11.375 | 3.958 | 8.260 | 9.958  | 13.223 | 3.184 | 5.598 | 11.751 | 11.241 | 4.569 | 7.380 | 10.543 | 11.744 |
| 10.5 | 4.088 | 6.051 | 10.568 | 11.574 | 4.576 | 7.713 | 10.578 | 13.381 | 3.821 | 5.747 | 10.619 | 11.816 | 4.748 | 6.888 | 11.110 | 12.579 |
| 11   | 4.577 | 6.147 | 10.803 | 13.129 | 4.897 | 7.922 | 10.989 | 13.486 | 3.294 | 5.268 | 11.428 | 10.304 | 4.567 | 7.038 | 10.332 | 12.870 |
| 11.5 | 3.650 | 4.748 | 10.493 | 12.466 | 3.646 | 7.521 | 10.601 | 13.241 | 3.789 | 6.080 | 11.710 | 11.485 | 4.153 | 6.893 | 10.548 | 11.651 |
| 12   | 4.298 | 6.027 | 11.169 | 12.073 | 4.463 | 6.792 | 11.039 | 13.456 | 3.665 | 5.544 | 10.847 | 11.977 | 4.591 | 7.042 | 11.208 | 12.735 |

| Time (h) | G325R |        |       | T355I |       |        | S846I |        |       | E928G  |       |       |       |       |       |       |
|----------|-------|--------|-------|-------|-------|--------|-------|--------|-------|--------|-------|-------|-------|-------|-------|-------|
|          | BG    | 0.1 nM | 1 nM  | 10 nM | 1 nM  | 0.1 nM | 1 nM  | 10 nM  | BG    | 0.1 nM | 1 nM  | 10 nM |       |       |       |       |
| 0        | 1.147 | 1.244  | 1.387 | 3.381 | 2.645 | 1.800  | 1.270 | 5.466  | 1.319 | 0.660  | 1.011 | 3.215 | 0.902 | 0.965 | 2.137 | 5.428 |
| 0.5      | 1.930 | 1.735  | 4.718 | 7.130 | 5.956 | 2.650  | 1.885 | 8.076  | 1.989 | 1.072  | 4.149 | 6.429 | 1.238 | 1.866 | 5.222 | 6.689 |
| 1        | 2.605 | 3.315  | 7.490 | 8.349 | 7.788 | 3.403  | 3.468 | 9.425  | 2.869 | 1.850  | 6.189 | 7.187 | 2.263 | 3.586 | 7.186 | 8.574 |
| 1.5      | 3.511 | 4.882  | 8.523 | 9.012 | 9.094 | 4.786  | 5.711 | 10.208 | 3.903 | 4.036  | 6.846 | 8.598 | 3.199 | 4.788 | 8.369 | 9.601 |
| 2        | 3.737 | 4.785  | 8.208 | 9.260 | 9.403 | 5.438  | 6.155 | 9.876  | 4.676 | 4.401  | 7.415 | 9.046 | 3.113 | 5.484 | 8.856 | 9.947 |

|      |       |       |        |        |       |       |        |        |       |       |        |        |       |       |        |        |
|------|-------|-------|--------|--------|-------|-------|--------|--------|-------|-------|--------|--------|-------|-------|--------|--------|
| 2.5  | 4.448 | 4.781 | 8.512  | 9.833  | 5.684 | 6.156 | 9.437  | 10.342 | 5.208 | 4.247 | 8.240  | 9.175  | 3.927 | 5.354 | 8.655  | 9.996  |
| 3    | 5.055 | 7.356 | 9.293  | 10.597 | 5.618 | 6.753 | 10.095 | 10.384 | 5.624 | 5.107 | 8.182  | 9.085  | 3.658 | 6.467 | 8.887  | 10.948 |
| 3.5  | 4.776 | 6.496 | 8.987  | 11.065 | 5.982 | 6.619 | 10.383 | 12.407 | 5.541 | 5.000 | 8.645  | 9.937  | 4.615 | 7.404 | 10.010 | 10.291 |
| 4    | 5.442 | 7.275 | 9.356  | 11.218 | 5.448 | 7.726 | 11.223 | 11.378 | 5.615 | 5.143 | 9.301  | 10.056 | 4.461 | 7.180 | 10.926 | 11.402 |
| 4.5  | 5.127 | 6.460 | 8.755  | 11.801 | 6.231 | 8.150 | 10.326 | 11.285 | 5.649 | 5.724 | 9.316  | 9.241  | 5.029 | 6.217 | 9.348  | 11.405 |
| 5    | 4.872 | 6.357 | 10.328 | 12.343 | 4.971 | 7.855 | 11.175 | 13.154 | 5.096 | 6.058 | 9.643  | 10.134 | 4.623 | 7.103 | 8.986  | 10.949 |
| 5.5  | 4.771 | 7.267 | 10.131 | 11.529 | 6.816 | 7.669 | 10.806 | 12.885 | 6.007 | 5.875 | 9.937  | 10.917 | 3.992 | 6.732 | 9.993  | 10.899 |
| 6    | 4.252 | 6.950 | 10.517 | 12.311 | 6.241 | 7.204 | 10.508 | 12.962 | 5.139 | 6.108 | 10.141 | 10.986 | 5.113 | 7.493 | 9.889  | 11.278 |
| 6.5  | 4.593 | 5.957 | 10.678 | 12.801 | 5.856 | 8.901 | 12.106 | 13.846 | 4.733 | 6.101 | 10.549 | 10.651 | 5.335 | 7.149 | 9.311  | 13.131 |
| 7    | 4.728 | 6.398 | 10.431 | 12.615 | 6.191 | 8.019 | 12.154 | 14.191 | 5.691 | 6.660 | 10.774 | 12.065 | 4.518 | 7.460 | 11.104 | 12.424 |
| 7.5  | 4.822 | 6.346 | 10.704 | 12.527 | 5.578 | 7.096 | 10.734 | 12.438 | 5.660 | 5.527 | 11.871 | 11.467 | 4.393 | 7.275 | 9.991  | 11.771 |
| 8    | 4.559 | 6.452 | 10.381 | 12.279 | 5.762 | 6.905 | 10.199 | 13.258 | 5.330 | 5.951 | 10.861 | 10.997 | 4.776 | 5.951 | 9.731  | 11.495 |
| 8.5  | 5.056 | 6.838 | 9.729  | 12.167 | 5.972 | 7.215 | 10.764 | 12.680 | 5.075 | 6.127 | 10.590 | 10.826 | 3.878 | 6.663 | 8.908  | 11.458 |
| 9    | 4.091 | 6.142 | 10.121 | 12.255 | 5.725 | 6.349 | 10.699 | 12.682 | 4.511 | 5.705 | 10.013 | 10.906 | 4.334 | 5.478 | 8.991  | 11.103 |
| 9.5  | 4.548 | 6.720 | 11.019 | 12.424 | 5.807 | 6.704 | 11.331 | 11.691 | 4.883 | 5.210 | 10.440 | 11.521 | 3.805 | 6.649 | 9.113  | 10.002 |
| 10   | 4.674 | 5.635 | 10.529 | 12.915 | 5.987 | 6.929 | 11.518 | 12.925 | 4.797 | 5.218 | 10.547 | 11.136 | 3.785 | 5.551 | 9.821  | 10.918 |
| 10.5 | 4.144 | 6.534 | 11.809 | 12.868 | 5.241 | 6.482 | 10.033 | 12.337 | 5.130 | 5.192 | 9.665  | 9.786  | 3.599 | 6.859 | 8.603  | 10.917 |
| 11   | 3.715 | 5.526 | 11.251 | 12.384 | 4.908 | 6.976 | 10.716 | 11.146 | 4.656 | 5.510 | 8.816  | 10.663 | 3.963 | 6.166 | 10.173 | 10.887 |
| 11.5 | 3.892 | 5.712 | 10.595 | 12.990 | 4.749 | 6.456 | 11.601 | 11.309 | 4.717 | 5.663 | 9.729  | 10.554 | 3.671 | 6.521 | 9.183  | 12.367 |
| 12   | 3.964 | 5.985 | 10.772 | 12.294 | 5.043 | 6.419 | 10.544 | 12.004 | 4.797 | 6.031 | 9.543  | 11.134 | 4.221 | 7.394 | 9.227  | 13.041 |

B) HER2 overexpression (+)

| Time (h) | EV    |        |       |       | WT    |        |        |        | V104L |        |        |        | V104M |        |        |        |
|----------|-------|--------|-------|-------|-------|--------|--------|--------|-------|--------|--------|--------|-------|--------|--------|--------|
|          | BG    | 0.1 nM | 1 nM  | 10 nM | BG    | 0.1 nM | 1 nM   | 10 nM  | BG    | 0.1 nM | 1 nM   | 10 nM  | BG    | 0.1 nM | 1 nM   | 10 nM  |
| 0        | 0.479 | 0.538  | 0.709 | 0.665 | 0.633 | 0.657  | 0.970  | 4.378  | 0.614 | 0.580  | 0.767  | 1.036  | 0.856 | 0.940  | 1.360  | 3.774  |
| 0.5      | 0.991 | 1.030  | 1.239 | 1.209 | 1.267 | 1.495  | 4.081  | 6.838  | 1.096 | 1.360  | 2.957  | 4.879  | 1.846 | 2.099  | 5.436  | 6.289  |
| 1        | 1.633 | 1.688  | 1.734 | 2.063 | 2.249 | 2.727  | 5.799  | 7.322  | 1.864 | 2.414  | 5.370  | 7.358  | 2.621 | 3.690  | 7.541  | 8.475  |
| 1.5      | 1.865 | 2.400  | 3.106 | 2.684 | 2.962 | 4.372  | 7.469  | 9.065  | 2.700 | 3.852  | 7.542  | 7.503  | 4.219 | 6.147  | 8.555  | 9.480  |
| 2        | 2.986 | 3.105  | 4.084 | 3.374 | 4.017 | 5.035  | 9.477  | 9.433  | 3.615 | 5.085  | 8.587  | 8.833  | 4.157 | 7.827  | 10.541 | 7.870  |
| 2.5      | 3.640 | 3.414  | 4.379 | 4.371 | 4.690 | 5.545  | 9.148  | 11.032 | 3.186 | 5.871  | 9.582  | 8.837  | 4.954 | 7.277  | 10.333 | 10.035 |
| 3        | 3.316 | 3.965  | 4.076 | 4.405 | 4.797 | 5.634  | 8.626  | 9.932  | 3.748 | 5.758  | 10.036 | 9.191  | 5.497 | 8.583  | 9.723  | 10.631 |
| 3.5      | 3.751 | 3.706  | 4.652 | 5.049 | 5.014 | 5.727  | 9.592  | 9.718  | 4.697 | 5.814  | 8.967  | 9.629  | 5.785 | 8.127  | 10.108 | 10.438 |
| 4        | 3.500 | 3.756  | 4.589 | 5.064 | 4.952 | 7.013  | 10.538 | 11.199 | 5.160 | 6.804  | 9.969  | 10.024 | 6.033 | 8.731  | 10.076 | 10.831 |
| 4.5      | 3.313 | 4.348  | 4.037 | 4.804 | 4.863 | 6.443  | 10.664 | 10.699 | 5.023 | 6.099  | 10.799 | 11.401 | 6.471 | 7.960  | 9.127  | 10.080 |
| 5        | 3.094 | 4.085  | 3.943 | 4.861 | 4.834 | 6.106  | 10.633 | 11.545 | 4.653 | 6.775  | 9.620  | 11.042 | 6.399 | 8.056  | 10.210 | 10.595 |
| 5.5      | 3.357 | 3.435  | 4.657 | 4.677 | 5.033 | 6.915  | 10.609 | 9.859  | 5.143 | 6.186  | 10.689 | 11.391 | 6.423 | 8.493  | 10.683 | 10.217 |
| 6        | 3.616 | 4.124  | 3.877 | 4.114 | 4.605 | 6.388  | 10.142 | 12.277 | 5.123 | 6.321  | 10.559 | 10.591 | 6.097 | 8.565  | 11.682 | 10.579 |
| 6.5      | 3.345 | 3.724  | 3.739 | 3.988 | 4.743 | 7.434  | 10.347 | 12.581 | 5.005 | 6.550  | 9.763  | 10.436 | 5.126 | 8.241  | 10.551 | 11.589 |
| 7        | 3.627 | 3.794  | 3.452 | 4.558 | 4.616 | 7.263  | 9.707  | 10.944 | 5.207 | 6.731  | 10.036 | 10.956 | 6.100 | 7.775  | 10.481 | 11.172 |
| 7.5      | 3.175 | 3.682  | 3.125 | 4.176 | 4.570 | 6.381  | 9.647  | 11.193 | 3.893 | 6.265  | 10.417 | 11.162 | 5.673 | 7.669  | 9.719  | 11.749 |
| 8        | 3.088 | 3.238  | 3.570 | 4.339 | 5.105 | 7.150  | 10.396 | 11.876 | 4.027 | 5.925  | 11.387 | 10.687 | 5.692 | 8.732  | 9.918  | 10.882 |
| 8.5      | 3.031 | 3.357  | 3.058 | 4.066 | 4.441 | 6.971  | 8.948  | 11.933 | 3.771 | 6.142  | 11.799 | 12.271 | 5.402 | 8.198  | 9.667  | 11.170 |
| 9        | 2.509 | 2.855  | 3.043 | 3.730 | 4.543 | 7.273  | 8.904  | 11.567 | 3.858 | 5.319  | 11.504 | 10.607 | 5.467 | 7.697  | 9.332  | 11.067 |
| 9.5      | 2.662 | 2.585  | 3.410 | 4.138 | 4.583 | 7.032  | 8.647  | 10.306 | 3.866 | 5.401  | 11.361 | 11.741 | 5.264 | 8.033  | 9.522  | 10.892 |

|      |       |       |       |       |       |       |       |        |       |       |        |        |       |       |        |        |
|------|-------|-------|-------|-------|-------|-------|-------|--------|-------|-------|--------|--------|-------|-------|--------|--------|
| 10   | 2.775 | 2.450 | 2.787 | 4.126 | 4.189 | 6.714 | 9.186 | 11.791 | 4.400 | 5.282 | 10.560 | 9.822  | 5.470 | 7.682 | 9.501  | 10.565 |
| 10.5 | 2.759 | 2.573 | 2.778 | 3.357 | 4.232 | 6.129 | 8.459 | 11.071 | 3.527 | 4.564 | 10.730 | 10.251 | 5.552 | 6.399 | 10.152 | 10.679 |
| 11   | 2.071 | 2.583 | 1.886 | 3.397 | 4.136 | 6.750 | 9.036 | 10.084 | 3.503 | 5.508 | 10.431 | 10.646 | 5.683 | 6.897 | 10.953 | 10.318 |
| 11.5 | 2.083 | 2.815 | 2.798 | 3.450 | 4.269 | 4.917 | 9.447 | 11.891 | 4.363 | 5.308 | 11.018 | 10.692 | 6.119 | 6.828 | 9.441  | 13.054 |
| 12   | 2.416 | 3.058 | 2.811 | 3.168 | 4.365 | 6.931 | 9.902 | 11.955 | 4.804 | 5.682 | 11.717 | 10.102 | 6.053 | 8.771 | 11.784 | 12.047 |

| Time (h) | A232V |        |        |        |       | P262H  |        |        |       |        | G284R  |        |       |        |        | D297Y  |    |        |      |       |  |
|----------|-------|--------|--------|--------|-------|--------|--------|--------|-------|--------|--------|--------|-------|--------|--------|--------|----|--------|------|-------|--|
|          | BG    | 0.1 nM | 1 nM   | 10 nM  | BG    | 0.1 nM | 1 nM   | 10 nM  | BG    | 0.1 nM | 1 nM   | 10 nM  | BG    | 0.1 nM | 1 nM   | 10 nM  | BG | 0.1 nM | 1 nM | 10 nM |  |
| 0        | 0.987 | 0.769  | 0.380  | 1.305  | 0.938 | 1.053  | 1.333  | 4.865  | 0.720 | 0.608  | 0.678  | 1.562  | 0.742 | 0.833  | 1.062  | 4.796  |    |        |      |       |  |
| 0.5      | 1.451 | 1.157  | 3.326  | 6.339  | 1.684 | 1.581  | 5.113  | 7.436  | 1.067 | 1.042  | 2.969  | 6.615  | 1.452 | 1.691  | 4.359  | 6.480  |    |        |      |       |  |
| 1        | 2.396 | 2.128  | 5.530  | 7.828  | 2.710 | 4.004  | 8.045  | 10.040 | 2.509 | 2.053  | 6.810  | 7.854  | 2.270 | 3.290  | 6.559  | 9.158  |    |        |      |       |  |
| 1.5      | 3.162 | 3.863  | 6.946  | 9.649  | 3.856 | 6.091  | 9.037  | 9.860  | 3.157 | 3.794  | 7.522  | 8.767  | 3.460 | 5.128  | 8.109  | 9.888  |    |        |      |       |  |
| 2        | 4.213 | 4.564  | 7.822  | 9.753  | 3.932 | 7.898  | 12.124 | 10.299 | 4.242 | 5.327  | 9.129  | 9.045  | 3.808 | 4.821  | 10.059 | 9.863  |    |        |      |       |  |
| 2.5      | 4.818 | 5.896  | 9.597  | 11.332 | 5.987 | 8.500  | 13.731 | 13.291 | 4.987 | 5.797  | 10.554 | 9.851  | 4.413 | 6.177  | 9.349  | 10.583 |    |        |      |       |  |
| 3        | 5.593 | 6.143  | 8.624  | 11.088 | 6.038 | 9.499  | 12.668 | 13.886 | 4.469 | 6.040  | 10.042 | 9.292  | 4.886 | 7.426  | 8.915  | 10.840 |    |        |      |       |  |
| 3.5      | 5.199 | 6.412  | 9.389  | 12.342 | 6.667 | 9.238  | 13.674 | 11.591 | 4.387 | 6.289  | 10.173 | 11.290 | 5.026 | 6.948  | 9.865  | 10.258 |    |        |      |       |  |
| 4        | 5.409 | 6.995  | 9.610  | 12.357 | 6.135 | 9.910  | 12.210 | 14.172 | 4.646 | 6.426  | 10.532 | 9.937  | 5.128 | 6.861  | 9.494  | 10.120 |    |        |      |       |  |
| 4.5      | 5.270 | 6.485  | 9.640  | 12.280 | 5.950 | 9.191  | 12.099 | 14.135 | 4.939 | 7.073  | 11.628 | 10.929 | 5.233 | 6.537  | 9.555  | 9.684  |    |        |      |       |  |
| 5        | 6.104 | 7.037  | 9.669  | 10.767 | 6.395 | 9.034  | 12.429 | 12.773 | 4.430 | 7.864  | 11.889 | 12.099 | 5.003 | 7.417  | 10.229 | 10.777 |    |        |      |       |  |
| 5.5      | 6.566 | 8.118  | 10.305 | 12.491 | 7.244 | 9.018  | 13.898 | 12.821 | 5.062 | 8.041  | 11.358 | 11.926 | 5.474 | 7.609  | 10.118 | 10.862 |    |        |      |       |  |
| 6        | 5.241 | 7.957  | 11.148 | 12.696 | 5.759 | 9.976  | 12.909 | 13.642 | 5.484 | 7.144  | 11.530 | 11.549 | 4.737 | 7.250  | 9.674  | 11.397 |    |        |      |       |  |
| 6.5      | 6.083 | 7.229  | 11.228 | 11.915 | 6.004 | 10.146 | 12.810 | 13.792 | 4.897 | 6.991  | 11.909 | 12.530 | 4.622 | 7.302  | 10.693 | 10.146 |    |        |      |       |  |

|      |       |       |        |        |       |       |        |        |       |       |        |        |       |       |        |        |
|------|-------|-------|--------|--------|-------|-------|--------|--------|-------|-------|--------|--------|-------|-------|--------|--------|
| 7    | 6.607 | 7.033 | 11.459 | 11.548 | 5.848 | 8.134 | 13.145 | 14.248 | 5.235 | 6.817 | 11.588 | 11.250 | 4.481 | 7.355 | 10.715 | 11.190 |
| 7.5  | 6.654 | 7.022 | 10.718 | 12.390 | 6.640 | 8.965 | 14.325 | 13.373 | 4.010 | 6.507 | 10.692 | 12.494 | 5.151 | 7.673 | 10.553 | 11.299 |
| 8    | 5.516 | 5.880 | 9.166  | 11.998 | 5.855 | 7.628 | 15.586 | 12.590 | 4.141 | 7.243 | 10.613 | 10.545 | 4.202 | 7.399 | 9.483  | 9.869  |
| 8.5  | 4.828 | 6.114 | 11.719 | 12.274 | 5.527 | 8.089 | 14.502 | 13.774 | 5.154 | 6.583 | 10.278 | 11.541 | 4.996 | 6.695 | 9.683  | 11.981 |
| 9    | 5.027 | 6.408 | 10.561 | 11.287 | 5.944 | 7.081 | 15.856 | 13.766 | 4.371 | 5.875 | 9.757  | 11.190 | 4.913 | 5.274 | 10.509 | 9.793  |
| 9.5  | 5.227 | 6.717 | 9.994  | 11.662 | 5.792 | 7.155 | 15.225 | 12.830 | 3.777 | 6.558 | 9.616  | 11.899 | 4.441 | 6.624 | 10.769 | 11.633 |
| 10   | 5.488 | 6.521 | 11.317 | 10.698 | 5.665 | 7.855 | 14.126 | 13.313 | 4.585 | 6.856 | 10.822 | 11.682 | 4.308 | 7.401 | 10.104 | 12.848 |
| 10.5 | 5.295 | 5.681 | 9.591  | 11.684 | 4.646 | 7.169 | 14.718 | 13.064 | 3.968 | 6.830 | 10.033 | 10.951 | 4.519 | 5.862 | 9.551  | 12.102 |
| 11   | 4.983 | 7.144 | 10.674 | 12.404 | 5.227 | 8.623 | 13.041 | 11.593 | 4.096 | 5.751 | 10.281 | 11.697 | 3.993 | 5.894 | 10.408 | 13.851 |
| 11.5 | 4.262 | 6.106 | 10.435 | 12.135 | 5.522 | 7.142 | 14.399 | 15.638 | 2.895 | 6.025 | 10.855 | 11.865 | 3.597 | 6.697 | 11.816 | 12.357 |
| 12   | 5.465 | 5.853 | 11.383 | 12.090 | 4.889 | 8.686 | 14.548 | 12.540 | 3.648 | 6.227 | 10.113 | 12.366 | 4.062 | 6.235 | 10.707 | 12.850 |

| Time (h) | G325R |        |       |        |       | T3551 |        |        |       |        | Q809R  |        |       |       |        | S846I  |        |      |       |  |
|----------|-------|--------|-------|--------|-------|-------|--------|--------|-------|--------|--------|--------|-------|-------|--------|--------|--------|------|-------|--|
|          | BG    | 0.1 nM | 1 nM  | 10 nM  | 10 nM | BG    | 0.1 nM | 1 nM   | 10 nM | 10 nM  | BG     | 0.1 nM | 1 nM  | 10 nM | 10 nM  | BG     | 0.1 nM | 1 nM | 10 nM |  |
| 0        | 0.565 | 0.803  | 0.861 | 1.430  | 0.691 | 0.894 | 1.842  | 4.814  | 1.293 | 1.626  | 1.228  | 3.009  | 0.819 | 0.669 | 0.802  | 1.782  |        |      |       |  |
| 0.5      | 0.944 | 1.339  | 4.141 | 6.290  | 1.599 | 1.652 | 5.099  | 6.901  | 2.056 | 1.801  | 5.342  | 7.746  | 1.401 | 1.181 | 4.177  | 6.345  |        |      |       |  |
| 1        | 1.537 | 2.321  | 5.993 | 8.039  | 2.144 | 3.427 | 6.403  | 7.889  | 2.621 | 4.808  | 7.600  | 8.271  | 2.059 | 2.301 | 6.704  | 7.720  |        |      |       |  |
| 1.5      | 2.095 | 3.839  | 8.350 | 8.123  | 2.933 | 4.337 | 8.386  | 9.630  | 4.341 | 6.953  | 10.980 | 9.238  | 2.532 | 3.585 | 8.206  | 8.701  |        |      |       |  |
| 2        | 3.476 | 4.940  | 8.080 | 10.184 | 3.997 | 5.472 | 8.854  | 9.530  | 5.785 | 8.617  | 12.100 | 11.797 | 3.909 | 5.161 | 8.737  | 8.968  |        |      |       |  |
| 2.5      | 3.232 | 5.813  | 9.328 | 10.158 | 4.919 | 6.199 | 8.749  | 10.773 | 6.625 | 9.997  | 13.954 | 11.107 | 4.062 | 4.996 | 9.366  | 9.598  |        |      |       |  |
| 3        | 4.354 | 7.716  | 9.806 | 11.207 | 4.593 | 7.046 | 9.466  | 10.793 | 8.429 | 11.227 | 15.097 | 12.643 | 4.280 | 6.559 | 8.791  | 10.354 |        |      |       |  |
| 3.5      | 4.850 | 7.057  | 9.559 | 11.597 | 5.545 | 7.317 | 9.841  | 11.822 | 7.702 | 9.927  | 15.683 | 14.642 | 3.868 | 6.494 | 10.330 | 10.674 |        |      |       |  |

|      |       |       |        |        |       |       |        |        |       |        |        |        |       |       |        |        |
|------|-------|-------|--------|--------|-------|-------|--------|--------|-------|--------|--------|--------|-------|-------|--------|--------|
| 4    | 4.485 | 6.270 | 9.483  | 10.365 | 5.478 | 7.373 | 9.721  | 11.816 | 7.800 | 11.538 | 14.250 | 14.973 | 4.498 | 5.976 | 10.962 | 11.069 |
| 4.5  | 4.088 | 7.262 | 10.912 | 11.053 | 5.652 | 7.414 | 11.086 | 12.173 | 7.249 | 10.891 | 16.352 | 13.314 | 5.226 | 6.595 | 10.773 | 10.824 |
| 5    | 4.317 | 7.199 | 11.529 | 10.758 | 5.540 | 6.788 | 9.437  | 9.674  | 8.293 | 9.652  | 15.621 | 14.305 | 5.551 | 6.294 | 11.399 | 11.166 |
| 5.5  | 5.274 | 6.576 | 10.360 | 12.758 | 6.303 | 7.554 | 10.507 | 11.911 | 8.919 | 10.163 | 15.296 | 15.459 | 6.074 | 6.868 | 10.456 | 12.078 |
| 6    | 3.295 | 6.008 | 11.376 | 11.264 | 6.111 | 8.323 | 11.207 | 12.233 | 7.442 | 10.876 | 11.312 | 16.128 | 4.439 | 7.213 | 11.499 | 10.863 |
| 6.5  | 3.548 | 6.652 | 12.137 | 10.185 | 5.925 | 8.177 | 10.195 | 12.145 | 7.873 | 9.533  | 14.216 | 12.952 | 3.286 | 6.992 | 10.569 | 11.239 |
| 7    | 3.643 | 6.490 | 10.505 | 11.060 | 5.391 | 7.541 | 11.652 | 12.207 | 6.518 | 9.383  | 16.366 | 12.348 | 4.348 | 6.097 | 11.385 | 10.324 |
| 7.5  | 2.555 | 6.517 | 10.740 | 10.731 | 4.422 | 6.932 | 10.202 | 13.191 | 6.356 | 10.436 | 11.687 | 12.106 | 4.111 | 6.003 | 9.545  | 11.879 |
| 8    | 3.367 | 6.730 | 10.029 | 10.845 | 4.619 | 7.217 | 10.124 | 12.585 | 6.657 | 9.509  | 12.904 | 13.155 | 4.487 | 6.068 | 11.526 | 11.407 |
| 8.5  | 3.674 | 6.252 | 10.256 | 11.656 | 4.964 | 7.699 | 10.894 | 13.156 | 5.076 | 8.215  | 12.681 | 14.228 | 4.370 | 6.005 | 9.903  | 12.460 |
| 9    | 3.784 | 5.581 | 9.236  | 10.362 | 4.879 | 7.022 | 11.050 | 11.737 | 5.649 | 8.446  | 16.454 | 12.735 | 3.720 | 5.571 | 10.227 | 10.833 |
| 9.5  | 3.275 | 5.465 | 10.160 | 11.791 | 5.882 | 7.215 | 10.008 | 13.605 | 4.374 | 8.220  | 13.484 | 12.640 | 4.088 | 6.236 | 10.223 | 11.459 |
| 10   | 3.275 | 6.005 | 9.856  | 11.264 | 5.358 | 6.687 | 9.883  | 11.776 | 4.584 | 7.231  | 13.764 | 13.982 | 4.408 | 6.161 | 9.931  | 12.265 |
| 10.5 | 2.807 | 5.408 | 9.438  | 12.227 | 4.598 | 6.491 | 10.900 | 13.160 | 4.920 | 7.026  | 13.589 | 14.671 | 3.569 | 5.394 | 9.857  | 11.532 |
| 11   | 3.824 | 6.803 | 9.976  | 12.475 | 4.003 | 7.076 | 10.929 | 11.397 | 5.289 | 8.243  | 14.133 | 10.825 | 4.041 | 5.818 | 10.380 | 12.100 |
| 11.5 | 2.280 | 6.805 | 10.165 | 11.385 | 4.817 | 6.963 | 10.168 | 13.932 | 5.675 | 7.234  | 13.353 | 10.264 | 2.927 | 5.993 | 10.714 | 11.167 |
| 12   | 2.832 | 5.758 | 10.272 | 11.505 | 4.012 | 5.825 | 10.013 | 11.250 | 5.318 | 6.987  | 16.123 | 8.948  | 3.230 | 6.126 | 10.231 | 13.004 |



| Time (h) | E928G |        |        |        |       |        | EV (HER2-) |       |       |        |        |        | WT (HER2-) |        |      |       |  |  |
|----------|-------|--------|--------|--------|-------|--------|------------|-------|-------|--------|--------|--------|------------|--------|------|-------|--|--|
|          | BG    | 0.1 nM | 1 nM   | 10 nM  | BG    | 0.1 nM | 1 nM       | 10 nM | BG    | 0.1 nM | 1 nM   | 10 nM  | BG         | 0.1 nM | 1 nM | 10 nM |  |  |
|          | 0     | 0.598  | 0.707  | 1.307  | 4.427 | 0.737  | 0.498      | 0.584 | 0.601 | 0.992  | 0.981  | 1.486  | 4.354      |        |      |       |  |  |
| 0.5      | 1.256 | 1.033  | 4.915  | 6.974  | 0.736 | 1.028  | 1.046      | 1.004 | 1.550 | 1.913  | 4.854  | 6.979  |            |        |      |       |  |  |
| 1        | 2.481 | 2.744  | 6.509  | 6.740  | 1.542 | 1.768  | 1.868      | 1.716 | 2.900 | 3.794  | 7.237  | 9.031  |            |        |      |       |  |  |
| 1.5      | 3.142 | 4.518  | 7.133  | 9.648  | 1.957 | 2.630  | 3.210      | 2.909 | 4.207 | 5.207  | 8.548  | 9.710  |            |        |      |       |  |  |
| 2        | 3.840 | 5.668  | 8.979  | 10.029 | 2.238 | 3.229  | 3.753      | 3.052 | 5.467 | 6.145  | 10.006 | 10.591 |            |        |      |       |  |  |
| 2.5      | 5.103 | 6.523  | 9.866  | 9.749  | 3.471 | 3.794  | 4.824      | 4.241 | 6.991 | 7.471  | 11.182 | 12.430 |            |        |      |       |  |  |
| 3        | 5.307 | 5.537  | 10.788 | 9.999  | 2.736 | 4.257  | 4.878      | 4.085 | 6.630 | 8.221  | 11.697 | 12.430 |            |        |      |       |  |  |
| 3.5      | 5.634 | 6.281  | 12.281 | 11.976 | 4.054 | 3.933  | 4.057      | 4.468 | 6.387 | 8.604  | 12.333 | 11.960 |            |        |      |       |  |  |
| 4        | 5.428 | 6.738  | 12.139 | 12.721 | 3.593 | 4.651  | 4.771      | 4.857 | 6.192 | 9.353  | 11.364 | 11.086 |            |        |      |       |  |  |
| 4.5      | 5.185 | 6.710  | 11.356 | 11.890 | 3.465 | 4.967  | 4.976      | 5.042 | 6.942 | 9.242  | 10.683 | 12.222 |            |        |      |       |  |  |
| 5        | 5.851 | 7.963  | 11.553 | 10.894 | 2.776 | 5.180  | 5.250      | 5.051 | 6.907 | 9.916  | 12.112 | 12.911 |            |        |      |       |  |  |
| 5.5      | 6.510 | 7.776  | 11.885 | 13.155 | 3.714 | 5.161  | 5.018      | 4.048 | 5.894 | 10.496 | 11.716 | 13.094 |            |        |      |       |  |  |
| 6        | 6.682 | 7.130  | 12.164 | 11.815 | 3.039 | 4.460  | 5.342      | 4.717 | 6.454 | 8.185  | 12.641 | 13.415 |            |        |      |       |  |  |
| 6.5      | 4.622 | 7.830  | 11.204 | 11.518 | 2.938 | 4.929  | 4.996      | 4.693 | 6.340 | 9.931  | 11.995 | 12.547 |            |        |      |       |  |  |
| 7        | 4.645 | 8.291  | 12.548 | 11.981 | 2.825 | 4.572  | 5.226      | 4.977 | 6.032 | 8.917  | 12.883 | 13.429 |            |        |      |       |  |  |
| 7.5      | 4.750 | 7.272  | 11.565 | 11.165 | 2.844 | 4.923  | 5.558      | 4.595 | 6.197 | 9.101  | 11.619 | 11.961 |            |        |      |       |  |  |
| 8        | 3.860 | 7.632  | 12.352 | 12.355 | 3.152 | 3.057  | 4.245      | 3.925 | 5.557 | 8.785  | 12.035 | 12.576 |            |        |      |       |  |  |
| 8.5      | 4.065 | 7.185  | 10.950 | 11.932 | 2.909 | 4.763  | 4.521      | 4.556 | 6.066 | 10.695 | 12.200 | 12.467 |            |        |      |       |  |  |
| 9        | 4.037 | 7.750  | 11.381 | 11.561 | 2.572 | 4.588  | 4.502      | 3.618 | 5.640 | 7.694  | 10.003 | 11.759 |            |        |      |       |  |  |
| 9.5      | 6.017 | 7.070  | 12.887 | 11.021 | 2.773 | 4.010  | 4.152      | 3.248 | 5.903 | 7.666  | 11.975 | 12.367 |            |        |      |       |  |  |
| 10       | 4.348 | 6.486  | 12.546 | 11.495 | 3.088 | 2.806  | 3.325      | 3.833 | 6.066 | 8.648  | 11.233 | 12.751 |            |        |      |       |  |  |

|      |       |       |        |        |       |       |       |       |       |        |        |        |
|------|-------|-------|--------|--------|-------|-------|-------|-------|-------|--------|--------|--------|
| 10.5 | 3.729 | 6.032 | 11.700 | 11.235 | 2.654 | 4.173 | 4.607 | 3.779 | 5.647 | 7.223  | 10.637 | 10.406 |
| 11   | 5.209 | 7.041 | 11.549 | 11.706 | 3.008 | 3.983 | 4.350 | 3.752 | 5.136 | 8.616  | 11.759 | 13.207 |
| 11.5 | 3.960 | 6.106 | 12.574 | 10.363 | 2.779 | 3.160 | 4.100 | 3.239 | 5.513 | 10.092 | 11.385 | 13.447 |
| 12   | 4.346 | 8.516 | 11.635 | 12.153 | 2.911 | 3.474 | 4.450 | 4.161 | 7.319 | 9.395  | 11.555 | 11.954 |
