# Supplementary material for: Patritumab deruxtecan (HER3-DXd), a novel HER3 directed antibody drug conjugate, exhibits in vitro activity against breast cancer cells expressing HER3 mutations with and without HER2 overexpression
Source: PubMed Central journal article supplement (PMC9064083; doi:10.1371/journal.pone.0267027), 2022-05-03
Supplement: pone.0267027.s008.pdf [file pone.0267027.s008.pdf]

A) HER2 overexpression (-)

| Time (h) | EV    |        |       |       | WT    |        |       |       | V104L |        |       |       | V104M |        |       |       |
|----------|-------|--------|-------|-------|-------|--------|-------|-------|-------|--------|-------|-------|-------|--------|-------|-------|
|          | BG    | 0.1 nM | 1 nM  | 10 nM | BG    | 0.1 nM | 1 nM  | 10 nM | BG    | 0.1 nM | 1 nM  | 10 nM | BG    | 0.1 nM | 1 nM  | 10 nM |
| 0        | 0.000 | 0.000  | 0.000 | 0.000 | 0.002 | 0.004  | 0.000 | 0.086 | 0.000 | 0.000  | 0.004 | 0.000 | 0.000 | 0.003  | 0.000 | 0.104 |
| 0.5      | 0.010 | 0.003  | 0.010 | 0.000 | 0.013 | 0.020  | 0.086 | 0.262 | 0.000 | 0.005  | 0.056 | 0.280 | 0.000 | 0.003  | 0.064 | 0.296 |
| 1        | 0.012 | 0.029  | 0.015 | 0.027 | 0.048 | 0.061  | 0.250 | 0.468 | 0.010 | 0.022  | 0.227 | 0.590 | 0.020 | 0.020  | 0.196 | 0.495 |
| 1.5      | 0.051 | 0.065  | 0.060 | 0.059 | 0.098 | 0.171  | 0.492 | 0.647 | 0.035 | 0.071  | 0.448 | 0.611 | 0.035 | 0.078  | 0.380 | 0.724 |
| 2        | 0.089 | 0.075  | 0.084 | 0.080 | 0.131 | 0.214  | 0.504 | 0.901 | 0.057 | 0.105  | 0.630 | 0.783 | 0.071 | 0.145  | 0.542 | 0.799 |
| 2.5      | 0.076 | 0.122  | 0.110 | 0.138 | 0.213 | 0.303  | 0.500 | 0.754 | 0.074 | 0.138  | 0.675 | 0.900 | 0.097 | 0.166  | 0.470 | 0.925 |
| 3        | 0.119 | 0.120  | 0.090 | 0.117 | 0.207 | 0.388  | 0.576 | 0.993 | 0.108 | 0.161  | 0.777 | 0.860 | 0.119 | 0.197  | 0.518 | 1.014 |
| 3.5      | 0.131 | 0.143  | 0.120 | 0.150 | 0.234 | 0.447  | 0.871 | 0.861 | 0.088 | 0.216  | 0.783 | 0.992 | 0.164 | 0.311  | 0.842 | 1.135 |
| 4        | 0.134 | 0.154  | 0.097 | 0.132 | 0.228 | 0.439  | 0.733 | 0.994 | 0.122 | 0.249  | 0.808 | 1.010 | 0.114 | 0.300  | 0.732 | 1.092 |
| 4.5      | 0.108 | 0.171  | 0.105 | 0.137 | 0.231 | 0.470  | 0.721 | 0.926 | 0.122 | 0.221  | 0.876 | 1.043 | 0.164 | 0.232  | 0.787 | 0.965 |
| 5        | 0.098 | 0.143  | 0.157 | 0.181 | 0.223 | 0.455  | 0.883 | 1.130 | 0.126 | 0.244  | 0.958 | 1.049 | 0.163 | 0.392  | 0.812 | 1.228 |
| 5.5      | 0.117 | 0.126  | 0.110 | 0.138 | 0.246 | 0.479  | 0.929 | 1.153 | 0.115 | 0.259  | 1.096 | 0.987 | 0.160 | 0.304  | 0.814 | 1.003 |
| 6        | 0.111 | 0.147  | 0.118 | 0.155 | 0.221 | 0.454  | 0.905 | 1.187 | 0.084 | 0.266  | 1.147 | 0.930 | 0.142 | 0.345  | 0.831 | 1.094 |
| 6.5      | 0.109 | 0.125  | 0.103 | 0.118 | 0.203 | 0.502  | 0.819 | 1.105 | 0.114 | 0.281  | 1.006 | 1.172 | 0.157 | 0.355  | 0.901 | 1.187 |
| 7        | 0.063 | 0.137  | 0.116 | 0.139 | 0.198 | 0.441  | 0.951 | 1.126 | 0.073 | 0.268  | 1.141 | 1.298 | 0.096 | 0.312  | 0.899 | 1.184 |
| 7.5      | 0.072 | 0.103  | 0.083 | 0.161 | 0.216 | 0.404  | 0.986 | 1.126 | 0.071 | 0.295  | 1.140 | 1.287 | 0.133 | 0.334  | 0.771 | 1.139 |
| 8        | 0.103 | 0.083  | 0.099 | 0.116 | 0.173 | 0.472  | 0.946 | 1.185 | 0.055 | 0.284  | 1.112 | 1.276 | 0.119 | 0.300  | 0.777 | 1.058 |

|      |       |       |       |       |       |       |       |       |       |       |       |       |       |       |       |       |
|------|-------|-------|-------|-------|-------|-------|-------|-------|-------|-------|-------|-------|-------|-------|-------|-------|
| 8.5  | 0.071 | 0.093 | 0.105 | 0.085 | 0.138 | 0.526 | 0.669 | 1.096 | 0.088 | 0.315 | 0.918 | 0.989 | 0.129 | 0.349 | 0.862 | 1.059 |
| 9    | 0.065 | 0.095 | 0.067 | 0.119 | 0.149 | 0.477 | 0.772 | 0.980 | 0.092 | 0.272 | 0.976 | 1.005 | 0.113 | 0.330 | 0.648 | 1.064 |
| 9.5  | 0.076 | 0.098 | 0.071 | 0.098 | 0.164 | 0.509 | 0.740 | 1.085 | 0.074 | 0.305 | 1.266 | 1.111 | 0.103 | 0.326 | 0.809 | 1.025 |
| 10   | 0.036 | 0.091 | 0.075 | 0.110 | 0.102 | 0.413 | 0.901 | 1.088 | 0.073 | 0.293 | 1.070 | 0.838 | 0.120 | 0.281 | 0.570 | 1.024 |
| 10.5 | 0.045 | 0.066 | 0.068 | 0.106 | 0.120 | 0.421 | 0.906 | 1.081 | 0.050 | 0.263 | 1.008 | 1.112 | 0.119 | 0.328 | 0.845 | 1.177 |
| 11   | 0.046 | 0.062 | 0.063 | 0.091 | 0.093 | 0.411 | 0.969 | 1.031 | 0.071 | 0.260 | 1.016 | 1.112 | 0.090 | 0.269 | 0.805 | 0.838 |
| 11.5 | 0.051 | 0.061 | 0.072 | 0.068 | 0.079 | 0.420 | 0.726 | 1.052 | 0.037 | 0.320 | 1.083 | 1.045 | 0.059 | 0.259 | 0.690 | 0.954 |
| 12   | 0.034 | 0.062 | 0.065 | 0.104 | 0.091 | 0.425 | 0.997 | 1.123 | 0.056 | 0.302 | 1.200 | 1.211 | 0.097 | 0.255 | 0.798 | 1.125 |

| Time (h) | A232V |        |       |       | P262H |        |       |       | G284R |        |       |       | D297Y |        |       |       |
|----------|-------|--------|-------|-------|-------|--------|-------|-------|-------|--------|-------|-------|-------|--------|-------|-------|
|          | BG    | 0.1 nM | 1 nM  | 10 nM | BG    | 0.1 nM | 1 nM  | 10 nM | BG    | 0.1 nM | 1 nM  | 10 nM | BG    | 0.1 nM | 1 nM  | 10 nM |
| 0        | 0.000 | 0.000  | 0.000 | 0.000 | 0.000 | 0.000  | 0.000 | 0.087 | 0.000 | 0.000  | 0.000 | 0.000 | 0.000 | 0.000  | 0.000 | 0.097 |
| 0.5      | 0.005 | 0.002  | 0.049 | 0.185 | 0.001 | 0.005  | 0.099 | 0.324 | 0.000 | 0.000  | 0.054 | 0.169 | 0.004 | 0.013  | 0.127 | 0.302 |
| 1        | 0.020 | 0.029  | 0.257 | 0.302 | 0.022 | 0.035  | 0.276 | 0.584 | 0.018 | 0.012  | 0.259 | 0.301 | 0.042 | 0.041  | 0.280 | 0.606 |
| 1.5      | 0.049 | 0.070  | 0.447 | 0.557 | 0.043 | 0.107  | 0.549 | 0.764 | 0.015 | 0.045  | 0.399 | 0.561 | 0.050 | 0.131  | 0.521 | 0.789 |
| 2        | 0.085 | 0.121  | 0.681 | 0.688 | 0.056 | 0.126  | 0.632 | 0.879 | 0.087 | 0.067  | 0.464 | 0.586 | 0.067 | 0.118  | 0.615 | 0.839 |
| 2.5      | 0.068 | 0.156  | 0.483 | 0.619 | 0.106 | 0.154  | 0.646 | 1.048 | 0.063 | 0.100  | 0.630 | 0.764 | 0.112 | 0.220  | 0.667 | 0.783 |
| 3        | 0.102 | 0.178  | 0.511 | 0.780 | 0.108 | 0.204  | 0.771 | 1.201 | 0.083 | 0.121  | 0.687 | 0.752 | 0.108 | 0.258  | 0.793 | 1.017 |
| 3.5      | 0.106 | 0.164  | 0.540 | 0.843 | 0.124 | 0.253  | 0.752 | 1.078 | 0.103 | 0.185  | 0.691 | 0.768 | 0.151 | 0.312  | 0.850 | 1.045 |
| 4        | 0.148 | 0.217  | 0.630 | 0.788 | 0.131 | 0.272  | 0.863 | 1.351 | 0.070 | 0.203  | 0.823 | 0.882 | 0.151 | 0.317  | 0.799 | 1.087 |
| 4.5      | 0.113 | 0.246  | 0.646 | 0.856 | 0.103 | 0.288  | 0.737 | 1.363 | 0.079 | 0.183  | 0.819 | 0.839 | 0.134 | 0.350  | 0.837 | 0.990 |
| 5        | 0.136 | 0.258  | 0.807 | 0.810 | 0.091 | 0.370  | 0.796 | 1.337 | 0.132 | 0.171  | 0.912 | 0.935 | 0.128 | 0.377  | 0.929 | 1.096 |

|      |       |       |       |       |       |       |       |       |       |       |       |       |       |       |       |       |
|------|-------|-------|-------|-------|-------|-------|-------|-------|-------|-------|-------|-------|-------|-------|-------|-------|
| 5.5  | 0.115 | 0.275 | 0.917 | 0.820 | 0.097 | 0.358 | 0.901 | 1.398 | 0.106 | 0.205 | 0.953 | 0.845 | 0.114 | 0.364 | 0.870 | 1.194 |
| 6    | 0.120 | 0.158 | 0.817 | 0.899 | 0.104 | 0.366 | 0.772 | 1.308 | 0.080 | 0.216 | 0.901 | 0.942 | 0.104 | 0.346 | 0.808 | 1.170 |
| 6.5  | 0.081 | 0.288 | 0.775 | 0.810 | 0.114 | 0.393 | 0.953 | 1.320 | 0.095 | 0.244 | 0.913 | 1.129 | 0.130 | 0.490 | 1.138 | 1.163 |
| 7    | 0.115 | 0.313 | 0.706 | 0.974 | 0.076 | 0.351 | 1.161 | 1.442 | 0.089 | 0.229 | 0.851 | 1.063 | 0.122 | 0.398 | 0.939 | 1.312 |
| 7.5  | 0.113 | 0.312 | 0.767 | 0.886 | 0.100 | 0.325 | 0.952 | 1.466 | 0.083 | 0.240 | 1.042 | 0.787 | 0.095 | 0.339 | 0.966 | 1.294 |
| 8    | 0.072 | 0.308 | 0.800 | 0.918 | 0.073 | 0.397 | 0.954 | 1.248 | 0.050 | 0.224 | 0.796 | 1.076 | 0.090 | 0.417 | 1.043 | 1.163 |
| 8.5  | 0.049 | 0.216 | 0.807 | 0.850 | 0.079 | 0.375 | 0.767 | 1.223 | 0.072 | 0.219 | 0.933 | 0.752 | 0.060 | 0.337 | 1.109 | 1.071 |
| 9    | 0.081 | 0.187 | 0.831 | 0.828 | 0.096 | 0.307 | 0.902 | 1.206 | 0.062 | 0.214 | 1.037 | 0.892 | 0.074 | 0.376 | 1.067 | 1.176 |
| 9.5  | 0.056 | 0.269 | 0.700 | 1.075 | 0.079 | 0.382 | 1.084 | 1.054 | 0.060 | 0.249 | 1.094 | 0.946 | 0.088 | 0.370 | 0.924 | 1.106 |
| 10   | 0.052 | 0.261 | 0.663 | 0.927 | 0.042 | 0.381 | 0.894 | 1.292 | 0.049 | 0.223 | 1.167 | 0.991 | 0.066 | 0.357 | 0.912 | 1.099 |
| 10.5 | 0.057 | 0.251 | 0.882 | 0.950 | 0.065 | 0.347 | 0.922 | 1.233 | 0.064 | 0.223 | 1.008 | 1.155 | 0.054 | 0.293 | 1.007 | 1.151 |
| 11   | 0.065 | 0.253 | 0.852 | 1.154 | 0.086 | 0.363 | 0.937 | 1.316 | 0.032 | 0.177 | 1.101 | 0.942 | 0.062 | 0.350 | 0.930 | 1.241 |
| 11.5 | 0.042 | 0.165 | 0.888 | 1.029 | 0.055 | 0.340 | 0.976 | 1.272 | 0.062 | 0.250 | 1.217 | 1.035 | 0.065 | 0.326 | 0.989 | 1.033 |
| 12   | 0.057 | 0.225 | 0.952 | 1.014 | 0.081 | 0.301 | 1.013 | 1.240 | 0.057 | 0.219 | 1.001 | 1.175 | 0.080 | 0.363 | 1.018 | 1.218 |

| Time (h) | G325R |        |       | T355I |       |        | S846I |       |       | E928G  |       |       |       |       |       |       |
|----------|-------|--------|-------|-------|-------|--------|-------|-------|-------|--------|-------|-------|-------|-------|-------|-------|
|          | BG    | 0.1 nM | 1 nM  | 10 nM | BG    | 0.1 nM | 1 nM  | 10 nM | BG    | 0.1 nM | 1 nM  | 10 nM |       |       |       |       |
| 0        | 0.001 | 0.004  | 0.000 | 0.000 | 0.005 | 0.002  | 0.000 | 0.131 | 0.000 | 0.000  | 0.000 | 0.000 | 0.000 | 0.000 | 0.000 | 0.148 |
| 0.5      | 0.009 | 0.000  | 0.049 | 0.234 | 0.028 | 0.007  | 0.152 | 0.465 | 0.013 | 0.000  | 0.039 | 0.269 | 0.001 | 0.007 | 0.123 | 0.344 |
| 1        | 0.022 | 0.020  | 0.238 | 0.460 | 0.052 | 0.040  | 0.298 | 0.652 | 0.019 | 0.005  | 0.187 | 0.363 | 0.016 | 0.042 | 0.297 | 0.590 |
| 1.5      | 0.055 | 0.071  | 0.428 | 0.620 | 0.116 | 0.092  | 0.546 | 0.809 | 0.063 | 0.045  | 0.317 | 0.600 | 0.054 | 0.084 | 0.455 | 0.777 |
| 2        | 0.076 | 0.065  | 0.464 | 0.595 | 0.145 | 0.150  | 0.594 | 0.746 | 0.107 | 0.071  | 0.423 | 0.701 | 0.064 | 0.135 | 0.532 | 0.802 |

|      |       |       |       |       |       |       |       |       |       |       |       |       |       |       |       |       |
|------|-------|-------|-------|-------|-------|-------|-------|-------|-------|-------|-------|-------|-------|-------|-------|-------|
| 2.5  | 0.090 | 0.099 | 0.547 | 0.791 | 0.162 | 0.138 | 0.679 | 0.853 | 0.150 | 0.090 | 0.549 | 0.762 | 0.087 | 0.151 | 0.568 | 0.853 |
| 3    | 0.143 | 0.214 | 0.644 | 0.830 | 0.168 | 0.210 | 0.743 | 0.824 | 0.182 | 0.112 | 0.568 | 0.740 | 0.081 | 0.224 | 0.641 | 0.965 |
| 3.5  | 0.110 | 0.204 | 0.601 | 0.921 | 0.177 | 0.206 | 0.751 | 1.121 | 0.170 | 0.116 | 0.686 | 0.839 | 0.136 | 0.329 | 0.799 | 0.956 |
| 4    | 0.142 | 0.246 | 0.672 | 0.991 | 0.137 | 0.299 | 0.914 | 1.040 | 0.184 | 0.119 | 0.765 | 0.804 | 0.113 | 0.318 | 0.977 | 1.120 |
| 4.5  | 0.134 | 0.245 | 0.597 | 1.114 | 0.173 | 0.342 | 0.835 | 1.014 | 0.165 | 0.210 | 0.830 | 0.780 | 0.132 | 0.247 | 0.803 | 1.083 |
| 5    | 0.098 | 0.231 | 0.818 | 1.163 | 0.111 | 0.310 | 0.955 | 1.259 | 0.159 | 0.223 | 0.811 | 0.873 | 0.109 | 0.327 | 0.762 | 1.066 |
| 5.5  | 0.097 | 0.294 | 0.772 | 0.961 | 0.196 | 0.320 | 0.898 | 1.186 | 0.211 | 0.200 | 0.900 | 0.975 | 0.093 | 0.295 | 0.850 | 1.002 |
| 6    | 0.069 | 0.255 | 0.834 | 1.030 | 0.186 | 0.289 | 0.804 | 1.186 | 0.155 | 0.233 | 0.893 | 0.951 | 0.129 | 0.352 | 0.880 | 1.086 |
| 6.5  | 0.069 | 0.227 | 0.856 | 1.121 | 0.139 | 0.411 | 1.045 | 1.356 | 0.119 | 0.247 | 0.922 | 0.873 | 0.147 | 0.349 | 0.815 | 1.304 |
| 7    | 0.086 | 0.284 | 0.877 | 1.145 | 0.162 | 0.344 | 1.035 | 1.396 | 0.168 | 0.275 | 0.977 | 1.087 | 0.088 | 0.401 | 1.086 | 1.235 |
| 7.5  | 0.097 | 0.256 | 0.844 | 1.065 | 0.126 | 0.262 | 0.853 | 1.149 | 0.153 | 0.192 | 1.099 | 0.970 | 0.096 | 0.386 | 0.899 | 1.126 |
| 8    | 0.065 | 0.263 | 0.824 | 1.100 | 0.129 | 0.294 | 0.806 | 1.315 | 0.156 | 0.229 | 1.018 | 0.943 | 0.094 | 0.282 | 0.846 | 1.103 |
| 8.5  | 0.091 | 0.272 | 0.721 | 1.063 | 0.145 | 0.284 | 0.855 | 1.086 | 0.125 | 0.248 | 0.944 | 0.905 | 0.066 | 0.325 | 0.684 | 1.084 |
| 9    | 0.070 | 0.251 | 0.835 | 1.114 | 0.132 | 0.225 | 0.850 | 1.147 | 0.104 | 0.197 | 0.843 | 0.999 | 0.092 | 0.244 | 0.702 | 1.011 |
| 9.5  | 0.080 | 0.277 | 0.895 | 1.206 | 0.121 | 0.294 | 0.986 | 1.064 | 0.113 | 0.182 | 0.923 | 1.049 | 0.078 | 0.309 | 0.766 | 0.884 |
| 10   | 0.070 | 0.212 | 0.826 | 1.212 | 0.148 | 0.281 | 0.972 | 1.159 | 0.102 | 0.180 | 0.917 | 0.958 | 0.062 | 0.242 | 0.821 | 1.009 |
| 10.5 | 0.057 | 0.313 | 1.022 | 1.167 | 0.115 | 0.227 | 0.745 | 1.046 | 0.118 | 0.202 | 0.815 | 0.809 | 0.051 | 0.338 | 0.682 | 1.059 |
| 11   | 0.039 | 0.220 | 0.950 | 1.095 | 0.096 | 0.284 | 0.878 | 0.926 | 0.085 | 0.231 | 0.725 | 0.937 | 0.047 | 0.284 | 0.938 | 1.007 |
| 11.5 | 0.046 | 0.233 | 0.820 | 1.191 | 0.080 | 0.245 | 0.988 | 0.951 | 0.103 | 0.227 | 0.856 | 0.963 | 0.055 | 0.301 | 0.750 | 1.225 |
| 12   | 0.060 | 0.268 | 0.851 | 1.134 | 0.103 | 0.255 | 0.838 | 1.042 | 0.111 | 0.255 | 0.826 | 0.998 | 0.066 | 0.384 | 0.785 | 1.256 |

B) HER2 overexpression (+)

| Time (h) | EV    |        |       |       |       | WT    |        |       |       |       | V104L |        |       |       |       | V104M |        |       |       |       |       |       |       |       |       |
|----------|-------|--------|-------|-------|-------|-------|--------|-------|-------|-------|-------|--------|-------|-------|-------|-------|--------|-------|-------|-------|-------|-------|-------|-------|-------|
|          | BG    | 0.1 nM | 1 nM  | 10 nM |       | BG    | 0.1 nM | 1 nM  | 10 nM |       | BG    | 0.1 nM | 1 nM  | 10 nM |       | BG    | 0.1 nM | 1 nM  | 10 nM |       |       |       |       |       |       |
|          | 0     | 0.001  | 0.000 | 0.005 | 0.000 | 0.000 | 0.000  | 0.004 | 0.000 | 0.090 | 0.000 | 0.003  | 0.000 | 0.000 | 0.000 | 0.000 | 0.000  | 0.004 | 0.000 | 0.032 | 0.000 | 0.000 | 0.004 | 0.000 | 0.032 |
| 0.5      | 0.002 | 0.005  | 0.002 | 0.000 | 0.000 | 0.006 | 0.003  | 0.065 | 0.395 | 0.010 | 0.011 | 0.006  | 0.145 | 0.008 | 0.008 | 0.011 | 0.076  | 0.232 | 0.000 | 0.000 | 0.011 | 0.076 | 0.232 | 0.000 | 0.000 |
| 1        | 0.021 | 0.016  | 0.022 | 0.018 | 0.037 | 0.037 | 0.028  | 0.211 | 0.501 | 0.014 | 0.028 | 0.150  | 0.397 | 0.039 | 0.039 | 0.051 | 0.224  | 0.429 | 0.039 | 0.039 | 0.051 | 0.224 | 0.429 | 0.039 | 0.039 |
| 1.5      | 0.024 | 0.049  | 0.053 | 0.042 | 0.063 | 0.063 | 0.097  | 0.412 | 0.745 | 0.048 | 0.072 | 0.371  | 0.410 | 0.107 | 0.107 | 0.151 | 0.425  | 0.623 | 0.048 | 0.048 | 0.151 | 0.425 | 0.623 | 0.048 | 0.048 |
| 2        | 0.065 | 0.076  | 0.105 | 0.072 | 0.106 | 0.106 | 0.135  | 0.657 | 0.781 | 0.090 | 0.133 | 0.551  | 0.666 | 0.098 | 0.098 | 0.278 | 0.607  | 0.439 | 0.090 | 0.090 | 0.278 | 0.607 | 0.439 | 0.090 | 0.090 |
| 2.5      | 0.094 | 0.091  | 0.109 | 0.099 | 0.185 | 0.185 | 0.179  | 0.707 | 1.045 | 0.074 | 0.181 | 0.704  | 0.713 | 0.175 | 0.175 | 0.259 | 0.595  | 0.728 | 0.074 | 0.074 | 0.259 | 0.595 | 0.728 | 0.074 | 0.074 |
| 3        | 0.075 | 0.121  | 0.098 | 0.101 | 0.187 | 0.187 | 0.224  | 0.648 | 1.004 | 0.082 | 0.202 | 0.848  | 0.742 | 0.216 | 0.216 | 0.385 | 0.654  | 0.796 | 0.082 | 0.082 | 0.385 | 0.654 | 0.796 | 0.082 | 0.082 |
| 3.5      | 0.099 | 0.087  | 0.128 | 0.139 | 0.184 | 0.184 | 0.212  | 0.804 | 0.904 | 0.131 | 0.211 | 0.708  | 0.876 | 0.230 | 0.230 | 0.410 | 0.758  | 0.833 | 0.131 | 0.131 | 0.410 | 0.758 | 0.833 | 0.131 | 0.131 |
| 4        | 0.095 | 0.098  | 0.117 | 0.148 | 0.171 | 0.171 | 0.297  | 0.905 | 1.164 | 0.152 | 0.282 | 0.813  | 0.918 | 0.243 | 0.243 | 0.438 | 0.760  | 0.884 | 0.152 | 0.152 | 0.438 | 0.760 | 0.884 | 0.152 | 0.152 |
| 4.5      | 0.083 | 0.135  | 0.103 | 0.125 | 0.169 | 0.169 | 0.276  | 0.975 | 1.041 | 0.134 | 0.233 | 0.982  | 1.096 | 0.233 | 0.233 | 0.346 | 0.729  | 0.776 | 0.134 | 0.134 | 0.346 | 0.729 | 0.776 | 0.134 | 0.134 |
| 5        | 0.071 | 0.117  | 0.070 | 0.152 | 0.189 | 0.189 | 0.287  | 0.960 | 1.172 | 0.122 | 0.269 | 0.882  | 1.042 | 0.228 | 0.228 | 0.397 | 0.862  | 0.855 | 0.122 | 0.122 | 0.397 | 0.862 | 0.855 | 0.122 | 0.122 |
| 5.5      | 0.079 | 0.090  | 0.139 | 0.097 | 0.190 | 0.190 | 0.337  | 0.918 | 0.988 | 0.131 | 0.251 | 0.991  | 1.170 | 0.221 | 0.221 | 0.435 | 0.883  | 0.840 | 0.131 | 0.131 | 0.435 | 0.883 | 0.840 | 0.131 | 0.131 |
| 6        | 0.083 | 0.113  | 0.095 | 0.086 | 0.160 | 0.160 | 0.278  | 0.911 | 1.224 | 0.122 | 0.278 | 0.914  | 0.917 | 0.202 | 0.202 | 0.429 | 0.999  | 0.848 | 0.122 | 0.122 | 0.429 | 0.999 | 0.848 | 0.122 | 0.122 |
| 6.5      | 0.073 | 0.093  | 0.076 | 0.092 | 0.149 | 0.149 | 0.390  | 0.921 | 1.307 | 0.141 | 0.278 | 0.890  | 0.969 | 0.159 | 0.159 | 0.414 | 0.882  | 0.939 | 0.141 | 0.141 | 0.414 | 0.882 | 0.939 | 0.141 | 0.141 |
| 7        | 0.065 | 0.088  | 0.068 | 0.117 | 0.145 | 0.145 | 0.369  | 0.879 | 1.062 | 0.120 | 0.336 | 0.974  | 1.034 | 0.186 | 0.186 | 0.361 | 0.878  | 0.960 | 0.120 | 0.120 | 0.361 | 0.878 | 0.960 | 0.120 | 0.120 |
| 7.5      | 0.049 | 0.093  | 0.072 | 0.082 | 0.124 | 0.124 | 0.343  | 0.872 | 1.152 | 0.056 | 0.281 | 0.996  | 1.049 | 0.187 | 0.187 | 0.390 | 0.784  | 0.918 | 0.056 | 0.056 | 0.390 | 0.784 | 0.918 | 0.056 | 0.056 |
| 8        | 0.047 | 0.050  | 0.081 | 0.088 | 0.155 | 0.155 | 0.348  | 0.999 | 1.238 | 0.083 | 0.267 | 1.080  | 0.959 | 0.189 | 0.189 | 0.435 | 0.793  | 0.838 | 0.083 | 0.083 | 0.435 | 0.793 | 0.838 | 0.083 | 0.083 |
| 8.5      | 0.053 | 0.068  | 0.052 | 0.078 | 0.125 | 0.125 | 0.367  | 0.718 | 1.255 | 0.074 | 0.241 | 1.200  | 1.313 | 0.154 | 0.154 | 0.388 | 0.686  | 0.931 | 0.074 | 0.074 | 0.388 | 0.686 | 0.931 | 0.074 | 0.074 |
| 9        | 0.052 | 0.054  | 0.047 | 0.067 | 0.128 | 0.128 | 0.387  | 0.793 | 1.204 | 0.083 | 0.204 | 1.136  | 1.014 | 0.159 | 0.159 | 0.403 | 0.724  | 1.001 | 0.083 | 0.083 | 0.403 | 0.724 | 1.001 | 0.083 | 0.083 |
| 9.5      | 0.051 | 0.047  | 0.068 | 0.075 | 0.112 | 0.112 | 0.379  | 0.727 | 1.018 | 0.062 | 0.235 | 1.087  | 1.204 | 0.145 | 0.145 | 0.448 | 0.789  | 0.917 | 0.062 | 0.062 | 0.448 | 0.789 | 0.917 | 0.062 | 0.062 |

|      |       |       |       |       |       |       |       |       |       |       |       |       |       |       |       |       |
|------|-------|-------|-------|-------|-------|-------|-------|-------|-------|-------|-------|-------|-------|-------|-------|-------|
| 10   | 0.051 | 0.053 | 0.045 | 0.061 | 0.105 | 0.392 | 0.850 | 1.217 | 0.116 | 0.213 | 1.011 | 0.896 | 0.143 | 0.390 | 0.794 | 0.935 |
| 10.5 | 0.045 | 0.050 | 0.044 | 0.051 | 0.107 | 0.308 | 0.710 | 1.121 | 0.074 | 0.173 | 0.997 | 0.968 | 0.141 | 0.304 | 0.864 | 0.881 |
| 11   | 0.027 | 0.048 | 0.031 | 0.041 | 0.087 | 0.356 | 0.759 | 1.002 | 0.071 | 0.247 | 0.972 | 0.974 | 0.156 | 0.325 | 0.963 | 0.776 |
| 11.5 | 0.029 | 0.046 | 0.052 | 0.049 | 0.084 | 0.210 | 0.892 | 1.282 | 0.088 | 0.250 | 1.082 | 1.004 | 0.174 | 0.332 | 0.788 | 1.161 |
| 12   | 0.043 | 0.062 | 0.048 | 0.047 | 0.107 | 0.336 | 0.917 | 1.283 | 0.110 | 0.276 | 1.110 | 0.838 | 0.153 | 0.536 | 0.976 | 1.028 |

| Time (h) | A232V |        |       |       | P262H |        |       |       | G284R |        |       |       | D297Y |        |       |       |
|----------|-------|--------|-------|-------|-------|--------|-------|-------|-------|--------|-------|-------|-------|--------|-------|-------|
|          | BG    | 0.1 nM | 1 nM  | 10 nM | BG    | 0.1 nM | 1 nM  | 10 nM | BG    | 0.1 nM | 1 nM  | 10 nM | BG    | 0.1 nM | 1 nM  | 10 nM |
| 0        | 0.000 | 0.002  | 0.000 | 0.000 | 0.001 | 0.002  | 0.000 | 0.080 | 0.003 | 0.002  | 0.000 | 0.000 | 0.007 | 0.003  | 0.000 | 0.069 |
| 0.5      | 0.010 | 0.000  | 0.027 | 0.184 | 0.002 | 0.010  | 0.116 | 0.346 | 0.007 | 0.008  | 0.027 | 0.288 | 0.010 | 0.008  | 0.093 | 0.326 |
| 1        | 0.031 | 0.005  | 0.174 | 0.390 | 0.009 | 0.038  | 0.352 | 0.623 | 0.042 | 0.011  | 0.246 | 0.541 | 0.042 | 0.045  | 0.254 | 0.666 |
| 1.5      | 0.059 | 0.070  | 0.313 | 0.675 | 0.062 | 0.136  | 0.482 | 0.609 | 0.062 | 0.054  | 0.395 | 0.643 | 0.076 | 0.117  | 0.500 | 0.833 |
| 2        | 0.106 | 0.115  | 0.420 | 0.722 | 0.070 | 0.243  | 0.872 | 0.701 | 0.095 | 0.124  | 0.611 | 0.669 | 0.112 | 0.135  | 0.751 | 0.820 |
| 2.5      | 0.169 | 0.172  | 0.639 | 0.949 | 0.160 | 0.301  | 1.128 | 1.181 | 0.183 | 0.160  | 0.849 | 0.878 | 0.149 | 0.237  | 0.745 | 1.028 |
| 3        | 0.198 | 0.214  | 0.590 | 0.919 | 0.197 | 0.412  | 1.105 | 1.306 | 0.139 | 0.173  | 0.861 | 0.802 | 0.183 | 0.351  | 0.741 | 1.058 |
| 3.5      | 0.177 | 0.263  | 0.774 | 1.121 | 0.233 | 0.398  | 1.155 | 0.960 | 0.122 | 0.219  | 0.880 | 1.016 | 0.190 | 0.333  | 0.849 | 0.943 |
| 4        | 0.168 | 0.331  | 0.856 | 1.193 | 0.186 | 0.481  | 1.003 | 1.382 | 0.135 | 0.244  | 0.969 | 0.852 | 0.178 | 0.334  | 0.826 | 1.028 |
| 4.5      | 0.174 | 0.266  | 0.820 | 1.144 | 0.180 | 0.441  | 1.052 | 1.346 | 0.155 | 0.296  | 1.154 | 1.089 | 0.185 | 0.322  | 0.907 | 0.948 |
| 5        | 0.206 | 0.321  | 0.805 | 0.945 | 0.207 | 0.438  | 1.099 | 1.125 | 0.136 | 0.331  | 1.116 | 1.188 | 0.172 | 0.373  | 0.981 | 1.168 |
| 5.5      | 0.231 | 0.430  | 0.966 | 1.196 | 0.248 | 0.425  | 1.375 | 1.148 | 0.161 | 0.384  | 1.071 | 1.148 | 0.190 | 0.389  | 0.923 | 1.155 |
| 6        | 0.146 | 0.401  | 1.041 | 1.240 | 0.172 | 0.502  | 1.176 | 1.191 | 0.178 | 0.289  | 1.142 | 1.116 | 0.167 | 0.365  | 0.911 | 1.252 |
| 6.5      | 0.176 | 0.335  | 1.027 | 1.067 | 0.166 | 0.535  | 1.175 | 1.286 | 0.133 | 0.291  | 1.173 | 1.247 | 0.153 | 0.359  | 1.037 | 0.987 |

|      |       |       |       |       |       |       |       |       |       |       |       |       |       |       |       |       |
|------|-------|-------|-------|-------|-------|-------|-------|-------|-------|-------|-------|-------|-------|-------|-------|-------|
| 7    | 0.214 | 0.351 | 1.027 | 1.074 | 0.159 | 0.387 | 1.180 | 1.322 | 0.160 | 0.328 | 1.103 | 1.051 | 0.152 | 0.366 | 1.063 | 1.131 |
| 7.5  | 0.198 | 0.342 | 0.956 | 1.158 | 0.204 | 0.444 | 1.413 | 1.217 | 0.081 | 0.281 | 1.037 | 1.325 | 0.165 | 0.422 | 1.084 | 1.175 |
| 8    | 0.142 | 0.235 | 0.712 | 1.102 | 0.166 | 0.336 | 1.608 | 1.078 | 0.084 | 0.338 | 0.984 | 0.965 | 0.124 | 0.395 | 0.829 | 0.948 |
| 8.5  | 0.119 | 0.255 | 1.111 | 1.141 | 0.143 | 0.414 | 1.465 | 1.269 | 0.136 | 0.260 | 1.031 | 1.185 | 0.137 | 0.352 | 0.936 | 1.269 |
| 9    | 0.110 | 0.304 | 0.925 | 0.994 | 0.151 | 0.339 | 1.540 | 1.308 | 0.097 | 0.261 | 0.946 | 1.039 | 0.114 | 0.273 | 1.089 | 0.936 |
| 9.5  | 0.132 | 0.359 | 0.885 | 1.052 | 0.134 | 0.329 | 1.550 | 1.177 | 0.080 | 0.323 | 0.970 | 1.233 | 0.093 | 0.346 | 1.125 | 1.266 |
| 10   | 0.127 | 0.322 | 1.096 | 0.992 | 0.139 | 0.346 | 1.318 | 1.251 | 0.112 | 0.351 | 1.144 | 1.160 | 0.094 | 0.417 | 0.969 | 1.439 |
| 10.5 | 0.133 | 0.220 | 0.820 | 1.143 | 0.095 | 0.343 | 1.445 | 1.162 | 0.092 | 0.326 | 1.086 | 1.121 | 0.104 | 0.297 | 0.919 | 1.241 |
| 11   | 0.110 | 0.348 | 0.969 | 1.234 | 0.109 | 0.427 | 1.159 | 0.989 | 0.088 | 0.243 | 1.048 | 1.268 | 0.097 | 0.289 | 1.073 | 1.612 |
| 11.5 | 0.089 | 0.247 | 0.945 | 1.144 | 0.124 | 0.348 | 1.437 | 1.556 | 0.058 | 0.284 | 1.102 | 1.193 | 0.074 | 0.370 | 1.259 | 1.292 |
| 12   | 0.144 | 0.271 | 1.011 | 1.093 | 0.087 | 0.462 | 1.362 | 1.153 | 0.062 | 0.289 | 1.037 | 1.317 | 0.085 | 0.331 | 1.124 | 1.429 |

| Time (h) | G325R |        |       |       |       | T3551  |       |       |       |        | Q809R |       |       |        |       | S846I |       |        |       |       |       |
|----------|-------|--------|-------|-------|-------|--------|-------|-------|-------|--------|-------|-------|-------|--------|-------|-------|-------|--------|-------|-------|-------|
|          | BG    | 0.1 nM | 1 nM  | 10 nM | BG    | 0.1 nM | 1 nM  | 10 nM | BG    | 0.1 nM | 1 nM  | 10 nM | BG    | 0.1 nM | 1 nM  | 10 nM | BG    | 0.1 nM | 1 nM  | 10 nM |       |
| 0        | 0.000 | 0.000  | 0.005 | 0.000 | 0.000 | 0.005  | 0.000 | 0.100 | 0.013 | 0.011  | 0.000 | 0.000 | 0.003 | 0.000  | 0.003 | 0.001 | 0.000 | 0.000  | 0.003 | 0.003 | 0.001 |
| 0.5      | 0.008 | 0.006  | 0.063 | 0.219 | 0.008 | 0.000  | 0.179 | 0.344 | 0.020 | 0.006  | 0.108 | 0.363 | 0.016 | 0.000  | 0.052 | 0.327 | 0.016 | 0.000  | 0.052 | 0.052 | 0.327 |
| 1        | 0.014 | 0.009  | 0.235 | 0.454 | 0.025 | 0.026  | 0.274 | 0.566 | 0.029 | 0.064  | 0.268 | 0.349 | 0.034 | 0.014  | 0.261 | 0.587 | 0.034 | 0.014  | 0.261 | 0.261 | 0.587 |
| 1.5      | 0.025 | 0.053  | 0.514 | 0.518 | 0.046 | 0.072  | 0.493 | 0.781 | 0.061 | 0.110  | 0.615 | 0.513 | 0.030 | 0.056  | 0.547 | 0.703 | 0.030 | 0.056  | 0.547 | 0.547 | 0.703 |
| 2        | 0.058 | 0.110  | 0.516 | 0.862 | 0.111 | 0.144  | 0.636 | 0.829 | 0.119 | 0.198  | 0.757 | 0.830 | 0.110 | 0.140  | 0.714 | 0.801 | 0.110 | 0.140  | 0.714 | 0.714 | 0.801 |
| 2.5      | 0.056 | 0.180  | 0.787 | 0.820 | 0.173 | 0.205  | 0.668 | 1.048 | 0.162 | 0.298  | 0.930 | 0.668 | 0.127 | 0.131  | 0.840 | 0.946 | 0.127 | 0.131  | 0.840 | 0.840 | 0.946 |
| 3        | 0.101 | 0.309  | 0.814 | 0.985 | 0.158 | 0.295  | 0.815 | 1.056 | 0.249 | 0.424  | 1.132 | 0.752 | 0.132 | 0.251  | 0.759 | 1.043 | 0.132 | 0.251  | 0.759 | 0.759 | 1.043 |
| 3.5      | 0.123 | 0.330  | 0.785 | 1.104 | 0.200 | 0.316  | 0.913 | 1.230 | 0.228 | 0.322  | 1.319 | 1.128 | 0.100 | 0.248  | 0.983 | 1.106 | 0.100 | 0.248  | 0.983 | 0.983 | 1.106 |

|      |       |       |       |       |       |       |       |       |       |       |       |       |       |       |       |       |
|------|-------|-------|-------|-------|-------|-------|-------|-------|-------|-------|-------|-------|-------|-------|-------|-------|
| 4    | 0.133 | 0.251 | 0.820 | 0.932 | 0.181 | 0.322 | 0.825 | 1.233 | 0.227 | 0.472 | 1.186 | 1.131 | 0.153 | 0.277 | 1.131 | 1.144 |
| 4.5  | 0.105 | 0.317 | 1.032 | 1.014 | 0.178 | 0.307 | 1.027 | 1.351 | 0.199 | 0.457 | 1.354 | 0.920 | 0.167 | 0.301 | 1.105 | 1.115 |
| 5    | 0.099 | 0.325 | 1.177 | 0.968 | 0.178 | 0.324 | 0.806 | 0.971 | 0.252 | 0.455 | 1.196 | 1.123 | 0.166 | 0.286 | 1.147 | 1.198 |
| 5.5  | 0.136 | 0.294 | 0.978 | 1.311 | 0.221 | 0.393 | 0.938 | 1.203 | 0.218 | 0.458 | 1.193 | 1.180 | 0.209 | 0.290 | 1.024 | 1.343 |
| 6    | 0.070 | 0.249 | 1.092 | 1.082 | 0.200 | 0.404 | 1.070 | 1.281 | 0.193 | 0.517 | 0.728 | 1.197 | 0.117 | 0.365 | 1.204 | 1.114 |
| 6.5  | 0.065 | 0.300 | 1.210 | 0.891 | 0.159 | 0.420 | 0.864 | 1.281 | 0.228 | 0.432 | 1.041 | 0.841 | 0.080 | 0.356 | 1.060 | 1.151 |
| 7    | 0.054 | 0.306 | 0.961 | 1.039 | 0.172 | 0.376 | 1.079 | 1.214 | 0.128 | 0.394 | 1.293 | 0.804 | 0.106 | 0.276 | 1.248 | 1.117 |
| 7.5  | 0.039 | 0.349 | 1.001 | 1.141 | 0.106 | 0.345 | 0.934 | 1.323 | 0.090 | 0.519 | 0.756 | 0.791 | 0.100 | 0.284 | 0.941 | 1.267 |
| 8    | 0.054 | 0.343 | 0.948 | 0.966 | 0.093 | 0.329 | 0.895 | 1.305 | 0.129 | 0.465 | 0.852 | 0.996 | 0.125 | 0.335 | 1.199 | 1.192 |
| 8.5  | 0.069 | 0.317 | 0.974 | 1.116 | 0.130 | 0.399 | 0.920 | 1.315 | 0.077 | 0.351 | 0.904 | 1.107 | 0.095 | 0.310 | 1.025 | 1.393 |
| 9    | 0.064 | 0.261 | 0.821 | 0.945 | 0.114 | 0.358 | 0.969 | 1.108 | 0.094 | 0.381 | 1.304 | 0.843 | 0.068 | 0.259 | 1.067 | 1.158 |
| 9.5  | 0.051 | 0.271 | 0.895 | 1.114 | 0.173 | 0.367 | 0.902 | 1.420 | 0.051 | 0.355 | 0.945 | 0.850 | 0.118 | 0.322 | 1.059 | 1.246 |
| 10   | 0.049 | 0.307 | 0.913 | 1.101 | 0.125 | 0.333 | 0.936 | 1.217 | 0.049 | 0.283 | 1.040 | 1.151 | 0.115 | 0.306 | 1.042 | 1.329 |
| 10.5 | 0.027 | 0.242 | 0.876 | 1.269 | 0.112 | 0.326 | 1.014 | 1.405 | 0.081 | 0.272 | 0.986 | 1.141 | 0.069 | 0.254 | 1.013 | 1.215 |
| 11   | 0.070 | 0.337 | 0.958 | 1.290 | 0.076 | 0.360 | 1.040 | 1.062 | 0.093 | 0.342 | 1.047 | 0.653 | 0.112 | 0.289 | 1.068 | 1.290 |
| 11.5 | 0.024 | 0.352 | 1.001 | 1.137 | 0.106 | 0.347 | 0.940 | 1.343 | 0.083 | 0.289 | 1.001 | 0.646 | 0.055 | 0.281 | 1.175 | 1.128 |
| 12   | 0.046 | 0.262 | 1.011 | 1.112 | 0.084 | 0.252 | 0.860 | 1.071 | 0.097 | 0.265 | 1.341 | 0.560 | 0.051 | 0.319 | 1.065 | 1.406 |



| Time (h) | E928G |        |       |       |  | EV (HER2-) |        |       |       |  | WT (HER2-) |        |       |       |  |
|----------|-------|--------|-------|-------|--|------------|--------|-------|-------|--|------------|--------|-------|-------|--|
|          | BG    | 0.1 nM | 1 nM  | 10 nM |  | BG         | 0.1 nM | 1 nM  | 10 nM |  | BG         | 0.1 nM | 1 nM  | 10 nM |  |
|          |       |        |       |       |  |            |        |       |       |  |            |        |       |       |  |
| 0        | 0.001 | 0.000  | 0.000 | 0.080 |  | 0.001      | 0.002  | 0.000 | 0.004 |  | 0.000      | 0.000  | 0.000 | 0.064 |  |
| 0.5      | 0.000 | 0.000  | 0.158 | 0.427 |  | 0.004      | 0.009  | 0.000 | 0.002 |  | 0.013      | 0.007  | 0.085 | 0.317 |  |
| 1        | 0.034 | 0.047  | 0.337 | 0.380 |  | 0.014      | 0.025  | 0.019 | 0.010 |  | 0.041      | 0.039  | 0.262 | 0.486 |  |
| 1.5      | 0.035 | 0.067  | 0.407 | 0.757 |  | 0.028      | 0.053  | 0.073 | 0.056 |  | 0.080      | 0.104  | 0.361 | 0.538 |  |
| 2        | 0.063 | 0.142  | 0.686 | 0.843 |  | 0.027      | 0.089  | 0.100 | 0.067 |  | 0.146      | 0.149  | 0.538 | 0.621 |  |
| 2.5      | 0.138 | 0.247  | 0.709 | 0.848 |  | 0.091      | 0.122  | 0.176 | 0.135 |  | 0.201      | 0.246  | 0.696 | 0.807 |  |
| 3        | 0.169 | 0.168  | 0.879 | 0.865 |  | 0.044      | 0.159  | 0.188 | 0.123 |  | 0.201      | 0.278  | 0.745 | 0.980 |  |
| 3.5      | 0.184 | 0.270  | 1.118 | 1.174 |  | 0.124      | 0.131  | 0.121 | 0.146 |  | 0.186      | 0.333  | 0.836 | 0.883 |  |
| 4        | 0.151 | 0.250  | 1.116 | 1.186 |  | 0.093      | 0.176  | 0.191 | 0.183 |  | 0.198      | 0.388  | 0.788 | 0.725 |  |
| 4.5      | 0.125 | 0.270  | 1.081 | 1.046 |  | 0.092      | 0.179  | 0.198 | 0.198 |  | 0.194      | 0.397  | 0.679 | 0.909 |  |
| 5        | 0.170 | 0.391  | 1.008 | 0.959 |  | 0.049      | 0.215  | 0.235 | 0.172 |  | 0.217      | 0.420  | 0.882 | 1.064 |  |
| 5.5      | 0.202 | 0.377  | 1.068 | 1.262 |  | 0.100      | 0.213  | 0.196 | 0.125 |  | 0.168      | 0.463  | 0.789 | 0.983 |  |
| 6        | 0.190 | 0.316  | 1.094 | 1.023 |  | 0.074      | 0.149  | 0.206 | 0.149 |  | 0.181      | 0.294  | 0.962 | 1.090 |  |
| 6.5      | 0.084 | 0.368  | 1.041 | 1.120 |  | 0.072      | 0.192  | 0.177 | 0.141 |  | 0.168      | 0.451  | 0.876 | 0.964 |  |
| 7        | 0.101 | 0.423  | 1.213 | 1.118 |  | 0.053      | 0.153  | 0.186 | 0.145 |  | 0.147      | 0.319  | 0.966 | 1.045 |  |
| 7.5      | 0.100 | 0.325  | 1.048 | 1.109 |  | 0.055      | 0.181  | 0.199 | 0.125 |  | 0.160      | 0.348  | 0.839 | 0.819 |  |
| 8        | 0.086 | 0.372  | 1.174 | 1.193 |  | 0.061      | 0.066  | 0.142 | 0.088 |  | 0.136      | 0.309  | 0.859 | 0.956 |  |
| 8.5      | 0.092 | 0.340  | 1.000 | 1.147 |  | 0.059      | 0.149  | 0.135 | 0.123 |  | 0.142      | 0.484  | 0.988 | 0.988 |  |
| 9        | 0.085 | 0.413  | 1.062 | 1.095 |  | 0.048      | 0.148  | 0.125 | 0.072 |  | 0.121      | 0.255  | 0.654 | 0.840 |  |
| 9.5      | 0.156 | 0.378  | 1.219 | 0.991 |  | 0.032      | 0.108  | 0.091 | 0.062 |  | 0.131      | 0.277  | 0.904 | 0.947 |  |
| 10       | 0.096 | 0.284  | 1.208 | 1.099 |  | 0.047      | 0.037  | 0.060 | 0.088 |  | 0.105      | 0.312  | 0.841 | 0.976 |  |

|      |       |       |       |       |       |       |       |       |       |       |       |       |
|------|-------|-------|-------|-------|-------|-------|-------|-------|-------|-------|-------|-------|
| 10.5 | 0.079 | 0.259 | 1.082 | 1.088 | 0.039 | 0.101 | 0.095 | 0.070 | 0.093 | 0.229 | 0.740 | 0.723 |
| 11   | 0.142 | 0.348 | 1.214 | 1.035 | 0.052 | 0.090 | 0.097 | 0.063 | 0.094 | 0.336 | 0.855 | 0.947 |
| 11.5 | 0.091 | 0.264 | 1.210 | 0.867 | 0.046 | 0.053 | 0.095 | 0.043 | 0.108 | 0.415 | 0.838 | 0.985 |
| 12   | 0.098 | 0.491 | 1.087 | 1.076 | 0.045 | 0.066 | 0.091 | 0.080 | 0.166 | 0.380 | 0.783 | 0.803 |
