# Supplementary material for: Patritumab deruxtecan (HER3-DXd), a novel HER3 directed antibody drug conjugate, exhibits in vitro activity against breast cancer cells expressing HER3 mutations with and without HER2 overexpression
Source: PubMed Central journal article supplement (PMC9064083; doi:10.1371/journal.pone.0267027), 2022-05-03
Supplement: pone.0267027.s009.pdf [file pone.0267027.s009.pdf]

A) HER2 overexpression (-)

| HER3  | Test article     | Cell viability (%) |       |       |       |       |     |  |
|-------|------------------|--------------------|-------|-------|-------|-------|-----|--|
|       |                  | #1                 | #2    | #3    | #4    | Mean  | SD  |  |
| EV    | Control          | 95.2               | 100.4 | 100.8 | 103.7 | 100.0 | 3.5 |  |
|       | 10 nM HER3-DXd   | 103.0              | 107.1 | 111.3 | 107.0 | 107.1 | 3.4 |  |
|       | 10 nM Patritumab | 99.7               | 108.1 | 116.9 | 109.0 | 108.4 | 7.0 |  |
|       | 10 nM IgG-ADC    | 101.7              | 108.6 | 105.2 | 107.7 | 105.8 | 3.1 |  |
| WT    | 10 nM Payload    | 12.3               | 15.2  | 12.5  | 13.0  | 13.3  | 1.3 |  |
|       | Control          | 99.8               | 95.7  | 103.9 | 100.5 | 100.0 | 3.4 |  |
|       | 10 nM HER3-DXd   | 87.4               | 85.7  | 90.2  | 84.4  | 86.9  | 2.5 |  |
|       | 10 nM Patritumab | 103.3              | 107.4 | 112.5 | 113.0 | 109.0 | 4.6 |  |
|       | 10 nM IgG-ADC    | 114.0              | 110.5 | 116.2 | 117.1 | 114.4 | 2.9 |  |
|       | 10 nM Payload    | 15.0               | 14.5  | 15.0  | 14.4  | 14.7  | 0.3 |  |
| V104L | Control          | 97.7               | 100.5 | 105.4 | 96.5  | 100.0 | 4.0 |  |
|       | 10 nM HER3-DXd   | 90.1               | 90.7  | 91.9  | 94.1  | 91.7  | 1.8 |  |
|       | 10 nM Patritumab | 100.6              | 107.2 | 112.4 | 114.0 | 108.6 | 6.0 |  |
|       | 10 nM IgG-ADC    | 105.4              | 112.5 | 120.0 | 112.4 | 112.6 | 6.0 |  |
| V104M | 10 nM Payload    | 9.6                | 10.1  | 9.7   | 10.5  | 10.0  | 0.4 |  |
|       | Control          | 99.1               | 97.8  | 105.9 | 97.2  | 100.0 | 4.0 |  |
|       | 10 nM HER3-DXd   | 83.3               | 92.9  | 93.0  | 96.6  | 91.5  | 5.7 |  |

|       |                  |       |       |       |       |       |     |
|-------|------------------|-------|-------|-------|-------|-------|-----|
|       | 10 nM Patritumab | 94.6  | 103.7 | 106.3 | 107.7 | 103.1 | 5.9 |
|       | 10 nM IgG-ADC    | 103.3 | 109.8 | 111.1 | 105.3 | 107.4 | 3.7 |
|       | 10 nM Payload    | 13.8  | 15.4  | 15.1  | 13.5  | 14.5  | 0.9 |
|       | Control          | 100.6 | 101.5 | 102.2 | 95.7  | 100.0 | 2.9 |
| A232V | 10 nM HER3-DXd   | 83.9  | 85.4  | 90.2  | 84.4  | 86.0  | 2.9 |
|       | 10 nM Patritumab | 101.5 | 106.0 | 110.6 | 98.8  | 104.2 | 5.1 |
|       | 10 nM IgG-ADC    | 107.8 | 106.5 | 114.5 | 109.3 | 109.5 | 3.5 |
|       | 10 nM Payload    | 11.5  | 13.9  | 14.4  | 13.8  | 13.4  | 1.3 |
|       | Control          | 102.6 | 99.3  | 96.3  | 101.8 | 100.0 | 2.8 |
| P262H | 10 nM HER3-DXd   | 83.7  | 84.5  | 85.9  | 87.2  | 85.3  | 1.6 |
|       | 10 nM Patritumab | 99.0  | 104.7 | 103.1 | 110.5 | 104.3 | 4.8 |
|       | 10 nM IgG-ADC    | 116.0 | 108.7 | 117.5 | 110.6 | 113.2 | 4.2 |
|       | 10 nM Payload    | 14.3  | 15.7  | 15.0  | 15.6  | 15.1  | 0.6 |
|       | Control          | 99.0  | 101.4 | 98.2  | 101.4 | 100.0 | 1.6 |
| G284R | 10 nM HER3-DXd   | 81.4  | 87.3  | 85.0  | 85.6  | 84.8  | 2.5 |
|       | 10 nM Patritumab | 95.5  | 105.6 | 106.2 | 110.5 | 104.4 | 6.3 |
|       | 10 nM IgG-ADC    | 105.5 | 115.3 | 115.2 | 116.1 | 113.0 | 5.1 |
|       | 10 nM Payload    | 15.3  | 16.3  | 17.8  | 17.5  | 16.7  | 1.1 |
|       | Control          | 98.4  | 103.3 | 98.1  | 100.2 | 100.0 | 2.4 |
| D297Y | 10 nM HER3-DXd   | 83.5  | 87.4  | 83.7  | 87.9  | 85.6  | 2.3 |
|       | 10 nM Patritumab | 99.2  | 111.2 | 111.9 | 105.2 | 106.9 | 6.0 |
|       | 10 nM IgG-ADC    | 109.7 | 104.2 | 110.1 | 117.9 | 110.5 | 5.6 |
|       | 10 nM Payload    | 13.5  | 14.2  | 15.1  | 16.6  | 14.8  | 1.3 |

|       |                  |       |       |       |       |       |     |
|-------|------------------|-------|-------|-------|-------|-------|-----|
| G325R | Control          | 100.8 | 102.4 | 99.4  | 97.4  | 100.0 | 2.1 |
|       | 10 nM HER3-DXd   | 88.8  | 99.0  | 87.5  | 90.6  | 91.5  | 5.2 |
|       | 10 nM Patritumab | 100.5 | 106.4 | 109.7 | 109.8 | 106.6 | 4.4 |
|       | 10 nM IgG-ADC    | 101.4 | 106.9 | 117.1 | 113.5 | 109.7 | 7.0 |
| T355I | 10 nM Payload    | 17.2  | 18.6  | 17.7  | 18.0  | 17.9  | 0.6 |
|       | Control          | 98.1  | 99.4  | 101.3 | 101.2 | 100.0 | 1.5 |
|       | 10 nM HER3-DXd   | 87.5  | 94.0  | 93.8  | 93.5  | 92.2  | 3.2 |
|       | 10 nM Patritumab | 103.6 | 103.9 | 109.4 | 107.9 | 106.2 | 2.9 |
| S846I | 10 nM IgG-ADC    | 107.3 | 113.2 | 116.3 | 117.2 | 113.5 | 4.5 |
|       | 10 nM Payload    | 12.7  | 15.3  | 15.8  | 16.4  | 15.0  | 1.6 |
|       | Control          | 96.1  | 98.9  | 100.9 | 104.0 | 100.0 | 3.3 |
|       | 10 nM HER3-DXd   | 81.7  | 83.6  | 95.6  | 91.5  | 88.1  | 6.5 |
| E928G | 10 nM Patritumab | 102.1 | 109.4 | 108.3 | 102.4 | 105.5 | 3.8 |
|       | 10 nM IgG-ADC    | 109.9 | 113.1 | 120.6 | 110.8 | 113.6 | 4.9 |
|       | 10 nM Payload    | 14.1  | 15.8  | 15.7  | 12.9  | 14.6  | 1.4 |
|       | Control          | 97.3  | 101.5 | 104.0 | 97.3  | 100.0 | 3.3 |
| E928G | 10 nM HER3-DXd   | 81.9  | 84.6  | 90.7  | 87.8  | 86.2  | 3.8 |
|       | 10 nM Patritumab | 93.6  | 96.3  | 108.1 | 105.1 | 100.8 | 7.0 |
|       | 10 nM IgG-ADC    | 102.6 | 104.1 | 110.3 | 112.2 | 107.3 | 4.7 |
|       | 10 nM Payload    | 11.0  | 13.3  | 13.3  | 14.2  | 13.0  | 1.4 |

B) HER2 overexpression (+)

| HER3  | Test article     | Cell viability (%) |       |       |       |       |       |     |  |  |  |
|-------|------------------|--------------------|-------|-------|-------|-------|-------|-----|--|--|--|
|       |                  | #1                 | #2    | #3    | #4    | #5    | Mean  | SD  |  |  |  |
| EV    | Control          | 98.3               | 93.8  | 105.6 | 103.2 | 99.1  | 100.0 | 4.6 |  |  |  |
|       | 10 nM HER3-DXd   | 96.5               | 99.4  | 98.9  | 91.6  | 94.5  | 96.2  | 3.2 |  |  |  |
|       | 10 nM Patritumab | 98.4               | 92.9  | 105.1 | 110.4 | 105.3 | 102.4 | 6.8 |  |  |  |
|       | 10 nM IgG-ADC    | 94.6               | 107.1 | 99.4  | 101.1 | 97.6  | 100.0 | 4.7 |  |  |  |
|       | 10 nM Payload    | 15.4               | 19.7  | 12.0  |       |       | 15.7  | 3.9 |  |  |  |
| WT    | Control          | 99.6               | 103.4 | 102.7 | 93.6  | 100.8 | 100.0 | 3.9 |  |  |  |
|       | 10 nM HER3-DXd   | 81.2               | 77.5  | 74.7  | 79.2  | 63.9  | 75.3  | 6.8 |  |  |  |
|       | 10 nM Patritumab | 93.2               | 96.7  | 95.1  | 96.7  | 98.6  | 96.1  | 2.0 |  |  |  |
|       | 10 nM IgG-ADC    | 107.4              | 106.2 | 99.6  | 98.9  | 99.2  | 102.3 | 4.2 |  |  |  |
|       | 10 nM Payload    | 13.6               | 13.0  | 12.8  |       |       | 13.1  | 0.4 |  |  |  |
| V104L | Control          | 91.7               | 104.7 | 108.3 | 99.6  | 95.7  | 100.0 | 6.7 |  |  |  |
|       | 10 nM HER3-DXd   | 75.8               | 80.2  | 83.1  | 79.4  | 72.6  | 78.2  | 4.1 |  |  |  |
|       | 10 nM Patritumab | 94.9               | 96.4  | 107.7 | 103.2 | 94.6  | 99.4  | 5.8 |  |  |  |
|       | 10 nM IgG-ADC    | 100.4              | 99.0  | 103.9 | 92.0  | 94.6  | 98.0  | 4.7 |  |  |  |
|       | 10 nM Payload    | 18.1               | 15.1  | 13.0  |       |       | 15.4  | 2.6 |  |  |  |
| V104M | Control          | 99.2               | 98.2  | 98.2  | 100.6 | 103.8 | 100.0 | 2.3 |  |  |  |
|       | 10 nM HER3-DXd   | 87.9               | 93.9  | 88.1  | 88.2  | 89.4  | 89.5  | 2.5 |  |  |  |
|       | 10 nM Patritumab | 99.2               | 101.0 | 101.8 | 103.1 | 99.5  | 100.9 | 1.6 |  |  |  |
|       | 10 nM IgG-ADC    | 104.7              | 111.2 | 99.9  | 97.6  | 94.4  | 101.6 | 6.6 |  |  |  |
|       | 10 nM Payload    | 20.5               | 20.2  | 20.6  |       |       | 20.4  | 0.2 |  |  |  |

|       |                  |       |       |       |       |       |       |     |
|-------|------------------|-------|-------|-------|-------|-------|-------|-----|
| A232V | Control          | 94.2  | 104.6 | 103.0 | 99.0  | 99.1  | 100.0 | 4.0 |
|       | 10 nM HER3-DXd   | 77.9  | 87.2  | 83.1  | 79.5  | 69.4  | 79.4  | 6.6 |
|       | 10 nM Patritumab | 98.7  | 92.9  | 100.9 | 97.9  | 102.1 | 98.5  | 3.5 |
|       | 10 nM IgG-ADC    | 100.0 | 107.4 | 102.3 | 99.8  | 95.2  | 100.9 | 4.4 |
|       | 10 nM Payload    | 16.4  | 17.6  | 14.1  |       |       | 16.0  | 1.8 |
| P262H | Control          | 101.6 | 100.2 | 96.9  | 102.8 | 98.6  | 100.0 | 2.4 |
|       | 10 nM HER3-DXd   | 70.3  | 71.8  | 70.2  | 66.4  | 69.6  | 69.7  | 2.0 |
|       | 10 nM Patritumab | 97.7  | 90.8  | 104.5 | 98.1  | 100.6 | 98.4  | 5.0 |
|       | 10 nM IgG-ADC    | 101.6 | 99.6  | 95.9  | 99.7  | 95.5  | 98.5  | 2.7 |
|       | 10 nM Payload    | 14.4  | 14.8  | 14.1  |       |       | 14.4  | 0.3 |
| G284R | Control          | 92.5  | 110.4 | 100.3 | 99.1  | 97.7  | 100.0 | 6.5 |
|       | 10 nM HER3-DXd   | 68.4  | 77.3  | 73.1  | 73.8  | 71.1  | 72.8  | 3.3 |
|       | 10 nM Patritumab | 93.7  | 96.4  | 101.0 | 102.6 | 99.3  | 98.6  | 3.6 |
|       | 10 nM IgG-ADC    | 108.8 | 107.3 | 105.4 | 103.1 | 94.0  | 103.7 | 5.8 |
|       | 10 nM Payload    | 15.4  | 17.9  | 11.1  |       |       | 14.8  | 3.5 |
| D297Y | Control          | 97.3  | 102.9 | 101.6 | 99.7  | 98.5  | 100.0 | 2.3 |
|       | 10 nM HER3-DXd   | 64.3  | 66.7  | 59.6  | 66.3  | 53.8  | 62.2  | 5.4 |
|       | 10 nM Patritumab | 95.4  | 98.7  | 93.4  | 95.4  | 95.8  | 95.7  | 1.9 |
|       | 10 nM IgG-ADC    | 103.2 | 103.6 | 100.2 | 98.2  | 96.6  | 100.4 | 3.1 |
|       | 10 nM Payload    | 12.5  | 12.5  | 8.4   |       |       | 11.1  | 2.4 |
| G325R | Control          | 99.9  | 97.0  | 98.0  | 100.3 | 104.8 | 100.0 | 3.0 |
|       | 10 nM HER3-DXd   | 71.5  | 68.4  | 64.6  | 67.4  | 64.6  | 67.3  | 2.9 |
|       | 10 nM Patritumab | 100.7 | 97.1  | 106.1 | 101.6 | 96.5  | 100.4 | 3.9 |



|                  |       |       |      |       |      |       |     |
|------------------|-------|-------|------|-------|------|-------|-----|
| 10 nM HER3-DXd   | 87.1  | 83.6  | 80.9 | 71.2  | 76.2 | 79.8  | 6.2 |
| 10 nM Patritumab | 93.8  | 91.7  | 94.4 | 97.6  | 92.2 | 93.9  | 2.4 |
| 10 nM IgG-ADC    | 110.0 | 100.9 | 99.3 | 102.2 | 95.6 | 101.6 | 5.3 |
| 10 nM Payload    | 13.6  | 11.9  | 11.4 |       |      | 12.3  | 1.2 |

### C) HER2 overexpression (+), Q809R

| HER3  | Test article     | Cell viability (%) |       |       |       |       |       |     |  |
|-------|------------------|--------------------|-------|-------|-------|-------|-------|-----|--|
|       |                  | #1                 | #2    | #3    | #4    | #5    | Mean  | SD  |  |
| EV    | Control          | 99.1               | 97.8  | 101.0 | 99.8  | 102.3 | 100.0 | 1.7 |  |
|       | 10 nM HER3-DXd   | 104.8              | 102.2 | 102.8 | 101.8 | 98.0  | 101.9 | 2.5 |  |
|       | 10 nM Patritumab | 99.1               | 104.9 | 104.9 | 110.8 | 104.6 | 104.9 | 4.1 |  |
|       | 10 nM IgG-ADC    | 106.0              | 104.4 | 106.6 | 106.3 | 95.2  | 103.7 | 4.8 |  |
|       | 10 nM Payload    | 24.9               | 22.2  | 19.3  |       |       | 22.2  | 2.8 |  |
| WT    | Control          | 101.2              | 98.0  | 99.9  | 101.2 | 99.7  | 100.0 | 1.3 |  |
|       | 10 nM HER3-DXd   | 87.9               | 89.2  | 90.9  | 90.0  | 77.6  | 87.1  | 5.4 |  |
|       | 10 nM Patritumab | 97.8               | 107.8 | 109.9 | 110.6 | 107.6 | 106.8 | 5.1 |  |
|       | 10 nM IgG-ADC    | 107.9              | 113.2 | 116.0 | 107.6 | 98.5  | 108.7 | 6.7 |  |
|       | 10 nM Payload    | 20.0               | 17.6  | 15.9  |       |       | 17.8  | 2.0 |  |
| Q809R | Control          | 100.0              | 100.6 | 101.3 | 99.3  | 98.8  | 100.0 | 1.0 |  |
|       | 10 nM HER3-DXd   | 83.5               | 86.3  | 87.3  | 83.2  | 77.8  | 83.6  | 3.7 |  |
|       | 10 nM Patritumab | 98.0               | 101.7 | 99.2  | 102.3 | 101.0 | 100.4 | 1.8 |  |

|            |                  |       |       |       |       |       |       |     |
|------------|------------------|-------|-------|-------|-------|-------|-------|-----|
|            | 10 nM IgG-ADC    | 102.2 | 97.7  | 100.7 | 102.5 | 97.0  | 100.0 | 2.5 |
|            | 10 nM Payload    | 20.2  | 20.2  | 18.7  |       |       | 19.7  | 0.9 |
| EV (HER2-) | Control          | 98.4  | 100.1 | 101.1 | 100.5 | 99.8  | 100.0 | 1.0 |
|            | 10 nM HER3-DXd   | 100.7 | 100.8 | 95.7  | 101.0 | 94.9  | 98.6  | 3.0 |
|            | 10 nM Patritumab | 98.9  | 100.7 | 100.8 | 104.1 | 103.8 | 101.7 | 2.2 |
|            | 10 nM IgG-ADC    | 104.1 | 101.7 | 101.4 | 99.1  | 98.2  | 100.9 | 2.3 |
|            | 10 nM Payload    | 20.3  | 19.2  | 17.3  |       |       | 18.9  | 1.5 |
|            | Control          | 95.1  | 99.9  | 100.7 | 102.8 | 101.4 | 100.0 | 2.9 |
| WT (HER2-) | 10 nM HER3-DXd   | 91.9  | 89.8  | 88.7  | 86.5  | 83.5  | 88.1  | 3.2 |
|            | 10 nM Patritumab | 100.2 | 99.3  | 102.8 | 103.3 | 103.4 | 101.8 | 1.9 |
|            | 10 nM IgG-ADC    | 103.7 | 104.9 | 103.1 | 100.5 | 97.9  | 102.0 | 2.8 |
|            | 10 nM Payload    | 19.8  | 19.8  | 17.6  |       |       | 19.1  | 1.3 |
